1 **Quantitative Proteomics and Phosphoproteomics Supports a Role for Mut9-Like Kinases**  
2 **in Multiple Metabolic and Signaling Pathways in *Arabidopsis***

3

4 **Margaret E. Wilson<sup>1</sup>, Shin-Cheng Tzeng<sup>1</sup>, Megan M. Augustin<sup>1</sup>, Matthew Meyer<sup>1</sup>, Xiaoyue**  
5 **Jiang<sup>2</sup>, Jae H. Choi<sup>3</sup>, John C. Rogers<sup>2</sup>, Bradley S. Evans<sup>1</sup>, Toni M. Kutchan<sup>1</sup>, Dmitri A.**  
6 **Nusinow<sup>1\*</sup>**

7

8 **<sup>1</sup>Donald Danforth Plant Science Center, St. Louis, MO, 63132, USA**

9 **<sup>2</sup>Thermo-Fisher Scientific, San Jose, CA, 95134, USA**

10 **<sup>3</sup>Thermo-Fisher Scientific, Rockford, IL, 61101 USA**

11 **\*To whom correspondence should be addressed [dnusinow@danforthcenter.org](mailto:dnusinow@danforthcenter.org)**

12

13 **Running Title: Quantitative Proteomic Analysis of MLK Family Kinases**

14

15

16

17

18

19

20

21

22

23

24

## 25 **Summary/Abstract**

26 Protein phosphorylation is one of the most prevalent post-translational modifications found in  
27 eukaryotic systems. It serves as a key molecular mechanism that regulates protein function in  
28 response to environmental stimuli. The Mut9-Like Kinases (MLKs) are a plant-specific family of  
29 Ser/Thr kinases linked to light, circadian, and abiotic stress signaling. Here we use quantitative  
30 phosphoproteomics in conjunction with global proteomic analysis to explore the role of the MLKs  
31 in daily protein dynamics. Proteins involved in light, circadian, and hormone signaling, as well as  
32 several chromatin-modifying enzymes and DNA damage response factors, were found to have  
33 altered phosphorylation profiles in the absence of MLK family kinases. In addition to altered  
34 phosphorylation levels, *mlk* mutant seedlings have an increase in glucosinolate metabolism  
35 enzymes. Subsequently, we show that a functional consequence of the changes to the proteome  
36 and phosphoproteome in *mlk* mutant plants is elevated glucosinolate accumulation, and  
37 increased sensitivity to DNA damaging agents. Combined with previous reports, this work  
38 supports the involvement of MLKs in a diverse set of stress responses and developmental  
39 processes, suggesting that the MLKs serve as key regulators linking environmental inputs to  
40 developmental outputs.

## 41 **Introduction**

42 Protein phosphorylation is a dynamic post-translational modification that is key in the regulation  
43 of protein function and turnover, making it an integral part of complex signaling networks. Rapid  
44 and reversible post-translational regulation is advantageous to plants, as they are often required  
45 to adapt to changing environments quickly. Moreover, protein phosphorylation is at the core of  
46 various biological processes, including stress response, light signaling, circadian regulation, and  
47 hormone perception and transduction. In Arabidopsis, nearly 4% of protein-encoding genes are  
48 kinases (Wang et al., 2014), which is a testament to the importance of phosphorylation-based  
49 protein regulation (Mergner et al., 2020). Despite the upswing of large-scale phosphoproteomic

50 studies in plant species (Silva-Sanchez et al., 2015; Mergner et al., 2020), a recent study suggests  
51 that the identification of *Arabidopsis* phosphoproteins and phosphosites is far from  
52 comprehensive (Vlastaridis et al., 2017).

53 The four-member family of Ser/Thr protein kinases known as the MT9-like  
54 kinase/Photoregulatory Protein Kinases/Arabidopsis EL1-like (MLK/PPK/AEL) kinases, herein  
55 referred to as the MLKs, are involved in the phosphoregulation of several key signaling proteins  
56 (Ni et al., 2017; Liu et al., 2017; Su et al., 2017; Chen et al., 2018). The MLKs are a plant and  
57 green algae-specific family of kinases related to casein kinase I (CKI). The MLKs show significant  
58 divergence from CKI, with similarities restricted to their catalytic domains (Casas-Mollano et al.,  
59 2008). MLK family kinases are capable of phosphorylating histones H3 and H2A in *Arabidopsis*  
60 (Wang et al., 2015a; Kang et al., 2020) as well as the green algae *Chlamydomonas* (Casas-  
61 Mollano et al., 2008). The *Chlamydomonas* MLK orthologue, MUT9, is also required for transgene  
62 silencing and response to DNA damaging agents (Casas-Mollano et al., 2008; Jeong Br et al.,  
63 2002). In addition to phosphorylating histones, MLK family kinases phosphorylate proteins  
64 involved in multiple signaling pathways. Early studies of a rice MLK orthologue, EARLY  
65 FLOWERING1 (EL1), have linked this kinase family to hormone signaling and the regulation of  
66 flowering time (Dai and Xue, 2010), a role which is at least in part conserved in *Arabidopsis*  
67 (Zheng et al., 2017; Chen et al., 2018; Huang et al., 2016; Kang et al., 2020; Sun et al., 2020).  
68 MLKs also interact with core components of the morning (Zheng et al., 2017; Su et al., 2017) and  
69 evening (Huang et al., 2016) loops of the *Arabidopsis* circadian clock. The association of the  
70 MLKs with the evening complex components, EARLY FLOWERING 3 AND 4 (ELF3 and ELF4),  
71 is dependent on the presence of the red light receptor phytochrome B (Huang et al., 2016).  
72 Additionally, the MLKs phosphorylate the blue light receptor CRYPTOCHROME2 and the red  
73 light-regulated transcription factor PHYTOCHROME INTERACTING FACTOR 3 (Ni et al., 2017;

74 Liu et al., 2017). In sum, these studies suggest that the MLKs provide a link between light and  
75 circadian signaling, which in turn regulates plant growth and development.

76 In this study, we used quantitative phosphoproteomic techniques to expand our understanding of  
77 the various signaling pathways and cellular protein networks regulated by the MLK family of  
78 kinases. We combined isobaric labeling with high pH reversed-phase prefractionation and TiO<sub>2</sub>  
79 based phosphopeptide enrichment to achieve an in-depth phosphoproteomic analysis of wild-  
80 type and *mlk* mutant seedlings at two different time points, one at the end of the day (ZT12) and  
81 the other several hours into the night (ZT14). We identified over 20,000 phosphosites mapping to  
82 nearly 5,000 protein groups. Notably, MLK mutant seedlings have altered abundance of  
83 glucosinolate metabolism enzymes, and differential phosphorylation of proteins involved in a  
84 diverse set of biological processes, including RNA processing, chromatin organization, and stress  
85 responses. The confluence of stress and chromatin factors suggested that MLKs may also  
86 regulate DNA-damage responses in *A. thaliana*, which was tested by assessing the sensitivity of  
87 *mlk* mutants to DNA-damaging agents.

## 88 **Experimental Procedures**

### 89 **Plant Material**

90 The *mlk1* (SALK\_002211; AT5G18190), *mlk2* (SALK\_064333; AT3G03940), and *mlk3*  
91 (SALK\_017102; AT2G25760) mutant lines were obtained from the ABRC (Ohio State University).  
92 The *mlk4* (GABI\_756G08; AT3G13670) mutant line was obtained from the Nottingham  
93 Arabidopsis Stock Centre. All are in the Columbia (Col-0) background and were isolated as  
94 previously described (Huang et al., 2016).

### 95 **Tissue Collection for Mass Spectrometry**

96 Arabidopsis wild type (Col-0) and mutant seedlings were grown on sterilized qualitative filter paper  
97 (Whatman) overlaid on ½ x MS (Murashige and Skoog) plates containing 1% sucrose and 0.8%

98 agar at 22°C. Seedlings were entrained under 12 h white light (100-110  $\mu\text{mol}/\text{m}^2/\text{s}$ )/12 h dark  
99 cycle. Tissue was collected on the 10<sup>th</sup> day of growth immediately before lights off [Zeitgeber 12,  
100 (ZT12)] or after 2h of dark (ZT14).

### 101 **Protein Isolation and Digestion**

102 The seedlings were transferred into a liquid N<sub>2</sub> chilled 35ml ball mill and disrupted in a reciprocal  
103 mixer mill [30 Hz, 45 seconds, repeated three times (Retsch USA)] under liquid nitrogen. Ground  
104 tissue was gently resuspended in 1 mL (approximately 1 packed tissue volume) of SII buffer (100  
105 mM sodium phosphate, pH 8.0, 150 mM NaCl, 5 mM EDTA, 5 mM EGTA, 0.1% Triton X-100, 1  
106 mM PMSF, 1x protease inhibitor cocktail [Roche], 1x Phosphatase Inhibitors II & III [Sigma], and  
107 50  $\mu\text{M}$  Mg-132 [Peptides International]) and sonicated twice at 40% power, 1 second on/off cycles  
108 for 20 s total on ice (Fisher Scientific model FB505, with microtip probe). Extracts were clarified  
109 by centrifugation twice at 4°C for 10 min at  $\geq 20,000\text{g}$ . Protein concentrations were determined  
110 by BCA protein assay (Thermo-Fisher Scientific, Rockford, IL). Protein samples were reduced  
111 with 10 mM TCEP and alkylated with 25 mM iodoacetamide before trypsin digestion in 1/40  
112 enzyme/protein ratio at 37°C overnight.

### 113 **Phosphopeptide Enrichment**

114 Phosphopeptide enrichment was performed using the High-Select<sup>TM</sup> TiO<sub>2</sub> Phosphopeptide  
115 Enrichment kit (Thermo Scientific PN32993) following the vendor's protocol. Briefly, dried  
116 peptides were reconstituted in 150  $\mu\text{L}$  of binding/equilibration buffer provided and applied to the  
117 TiO<sub>2</sub> spin that was previously equilibrated with binding buffer/equilibration. After reapplying  
118 sample once, the tip was sequentially washed twice with 20  $\mu\text{L}$  of binding buffer and wash buffer,  
119 and once with 20  $\mu\text{L}$  of LC-MS grade water. Bound peptides were eluted by two applications of  
120 50  $\mu\text{L}$  of elution buffer (also provided). Eluates containing the enriched phosphopeptides were

121 dried down and subsequently resuspended with 50  $\mu$ l 0.1% formic acid for peptide concentration  
122 measurement using the Pierce Quantitative Colorimetric Assay kit (Thermo Scientific PN23275).

### 123 **Tandem Mass Tag (TMT) Labeling**

124 100  $\mu$ g of each digested sample was added to 100  $\mu$ L of 100 mM HEPES pH 8.5 buffer. A  
125 reference pooled sample composed of equal amounts of material from all samples was also  
126 generated to link TMT experiments. Isobaric labeling of the samples was performed using 10-plex  
127 tandem mass tag (TMT) reagents (Thermo Fisher Scientific, Rockford, IL). All individual and  
128 pooled samples were labeled according to the TMT 10-plex reagent kit instructions. Briefly, TMT  
129 reagents were brought to room temperature and dissolved in anhydrous acetonitrile. Peptides  
130 were labeled by the addition of each label to its respective digested sample. Labeling reactions  
131 were incubated for 1 h at room temperature. Reactions were terminated with the addition of  
132 hydroxylamine.

### 133 **High pH Reverse Phase Fractionation**

134 High pH reverse phase fractionation was performed using the Pierce High pH Reversed-Phase  
135 Peptide Fractionation Kit (Thermo Scientific PN84868) according to the manufacturer's  
136 instructions. Briefly, peptide samples were dissolved in 300  $\mu$ L of 0.1% TFA solution in LC-MS  
137 grade water and subsequently loaded onto reversed-phase fractionation spin columns also  
138 equilibrated with 0.1% TFA. Samples were then washed with 300  $\mu$ L of 5% ACN/ 0.1% TEA to  
139 remove unreacted TMT reagent. Peptides were eluted into 8 peptide fractions with an ACN step  
140 gradient (i.e. 10%, 12.5%, 15%, 17.5%, 20%, 22.5%, 25%, and 50%). Samples were acidified  
141 and dried down prior to LC-MS.

### 142 **LC-MS/MS Analysis**

143 Two microliters (one microgram) of each sample was injected onto a 0.075 x 500 mm EASY-  
144 Spray Pepmap C18 column equipped with a 0.100 x 5 mm EASY-Spray Pepmap C18 trap column

145 (Thermo-Fisher Scientific, San Jose, CA) attached to an EASY-nLC 1000 (Thermo-Fisher  
146 Scientific, San Jose, CA). The peptides were separated using water (A) and acetonitrile (B)  
147 containing 0.1% formic acid as solvents at a flow rate of 300 nL per minute with a three-hour  
148 gradient. Data were acquired in positive ion data-dependent mode on an Orbitrap Fusion Lumos  
149 mass spectrometer (Thermo-Fisher Scientific, San Jose, CA) with a resolution of 120,000 (at  $m/z$   
150 200) and a scan range from  $m/z$  380-1500. Precursor isolation was performed using the  
151 quadrupole prior to either CID activation in the ion trap and detection in the Orbitrap at a resolution  
152 of 30,000 or HCD activation with detection in the Orbitrap at a resolution of 60,000.

### 153 **Data Analysis**

154 All MS/MS data were analyzed using Proteome Discoverer 2.1 (Thermo-Fisher Scientific, San  
155 Jose, CA). The search algorithm used in the study was Byonic v2.11 as part of the Proteome  
156 Discoverer software platform. Precursor ion mass tolerance was set to 10 ppm, and fragment ion  
157 tolerance was 20 ppm; up to 2 missed cleavages were allowed. Carbamidomethylation (+57.021  
158 Da) on cysteine and TMT tag (+229.163 Da) on peptide N-termini as well as lysine residues were  
159 set as static modifications. Dynamic modifications included acetylation (+42.011 Da) on protein  
160 N-termini, oxidation (+15.995 Da) on methionine and phosphorylation (+79.966 Da) on serine,  
161 threonine, and tyrosine. Data were searched against the TAIR10 database (20101214, 35,386  
162 entries) with FDR set to 1%.

163 For quantitation, reporter ion intensity integration tolerance was set to 20 ppm. Reporter ion  
164 abundances were corrected for isotopic impurities based on manufacturer's specifications. For  
165 each peptide, a minimal average reporter S/N threshold of 2 and a co-isolation threshold of 100%  
166 are required. The S/N values for all peptides were summed within each TMT channel, and each  
167 channel was scaled according to the reference channel. Both unique and razor peptides were  
168 used for quantification.

169 Peptides of altered abundance were identified from the Bionic output list generated from HCD  
170 MS2 analysis using Microsoft Excel. Abundance ratios for mutant/wild type pairwise comparisons  
171 were calculated from the average peptide abundance of mutant and wild-type biological  
172 replicates. Only peptides identified in at least two biological replicates were considered for further  
173 analysis. Statistical significance was determined by Student's *t*-test ( $P$ -value  $\leq 0.05$ ).

#### 174 **Bioinformatic Analysis**

175 The Motif-X algorithm (Chou and Schwartz, 2011) was used to extract significantly enriched  
176 phosphorylation motifs from *mlk1/2/3* and *mlk1/3/4* phosphopeptide data sets. Only  
177 phosphopeptides with high confidence phosphorylation sites were used in the analysis. The  
178 peptides were aligned and extended to a width of 15 amino acids using the online utility  
179 PEPTIDEXTENDER ver.0.2.2 alpha ([schwartzlab.uconn.edu/pepextend/](http://schwartzlab.uconn.edu/pepextend/)). The aligned peptides  
180 were used to extract motifs. The probability threshold was set to  $p$ -value  $\leq 10^{-5}$ ; the occurrence  
181 threshold was set to 10. The default IPI Arabidopsis Proteome data set was used as the  
182 background data set.

183 Enrichment analysis of Gene ontology (GO) categories was performed with g:Profiler (Reimand  
184 et al., 2016). AGI accession numbers for Arabidopsis were uploaded to the g:Profiler web server  
185 (<http://biit.cs.ut.ee/gprofiler/>), and GO enrichment was determined using default settings  
186 (significance level 0.05). Enriched terms were summarized, and redundancy removed using the  
187 online tool REVIGO (Supek et al., 2011). Semantic similarity threshold (dispensability) was set to  
188 0.5 (default) for all global proteome analysis and cellular component category of the  
189 phosphoproteome analysis. Dispensability was increased to 0.7 for all other analyses.

#### 190 **Glucosinolate Extraction and Analysis by HPLC and LC-MS/MS**

191 Arabidopsis seeds (Col-0, *mlk 1/2/3*, and *mlk 1/3/4*) were sown on  $\frac{1}{2}$  x MS (Murashige and Skoog)  
192 plates containing 1% sucrose and 0.8% agar and grown under 12 h white light (100-110



193  $\mu\text{mol}/\text{m}^2/\text{s}$ )/12 h dark cycle at 22°C for 10 days before harvesting at ZT12. Glucosinolates were  
194 extracted from approximately 350 mg of whole seedlings and desulfonated (in quadruplicate) as  
195 previously described (Crocchi *et al.* 2016) using sinigrin as an internal standard. Desulfo-GLS  
196 extracts were analyzed by HPLC (Waters) equipped with a photodiode array detector and  
197 separated using a Gemini C-18 column (150 X 2.00 mm, 5  $\mu\text{m}$ ; Phenomenex) with a flow rate of  
198 0.5 mL per minute and the following solvents and binary gradient: solvent A-water and solvent B-  
199 acetonitrile; where solvent B was held at 1.5% for 1 min, then 1-6 min 1.5-5% B, 6-8 min 5-7% B,  
200 8-18 min 7-21% B, 18-23 min 21-29% B, 23-30 min 29-43% B, 30-33 min 43-100% B, 33-37 100%  
201 B, 37-38 min 100-1.5% B, and held at 1.5% B for an additional 7 minutes. GLS peaks were  
202 identified using previously published UV spectra in addition to reported relative retention times  
203 and quantitated using peak areas of desulfo-GLS and internal standard along with published  
204 response factors (Brown *et al.* 2003, Grosser and Dam 2017). GLS identities were confirmed by  
205 LC-MS/MS (SCIEX 6500 QTRAP, Framingham, MA) using enhanced product ion (EPI; ion trap  
206 MS/MS) scans to verify the presence of previously published fragment ions (Crocchi *et al.* 2016)  
207 from each glucosinolate ion. Mass spectrometric data were collected in positive ion mode using  
208 the same gradient/solvents/column as for HPLC-UV analysis with the following source conditions:  
209 curtain gas, 20; ion-spray voltage, 5500 V; temperature, 500°C; gas 1, 40; gas 2, 45; declustering  
210 potential, 80 V; entrance potential, 10 V; collision energy 20 eV.

## 211 **MMS Treatment**

212 *Arabidopsis* wild type (Col-0) and mutant seed was surface-sterilized and sown on  $\frac{1}{2}$  x MS  
213 (Murashige and Skoog) plates containing 1% sucrose and 0.8% agar with or without methyl  
214 methanesulfonate (MMS, Sigma). After stratification for two days at 4°C, seedlings were grown  
215 under 12 h white light ( $100\text{-}110 \mu\text{mol}/\text{m}^2/\text{s}$ )/12 h dark cycle at 22°C. For growth sensitivity assays,  
216 seedlings were germinated on control media, and after five days of growth were transferred to  
217 MMS treatment media. Fresh weight was measured after 15 days of growth in the presence of

218 MMS. For post-germination developmental assessment, the seed was germinated on ½ x MS  
219 plates containing 1% sucrose, 0.8% agar, and 150 ppm MMS. Seedlings were imaged and scored  
220 for arrest at 12 days after germination.

### 221 **UV-C Tolerance Assay**

222 Whole-plant sensitivity to UV-C (254 nm) was evaluated as described in Castells et al. (2010) with  
223 the following modifications. 8-day old seedlings were irradiated with 2000 or 4000 J m<sup>-2</sup> of UV-C  
224 twice during a 48 hr time period using a Stratalinker® UV Crosslinker 1800. Following each  
225 treatment, plants were returned to growth conditions of 12 h white light (100-110 μmol/m<sup>2</sup>/s)/12 h  
226 dark cycle at 22°C. Seedlings were imaged after five days of recovery, and their phenotypes were  
227 measured.

228

## 229 **Results**

### 230 **Proteomic Analysis Reveals Changes in Stress Response Pathways in *mlk* Mutant** 231 **Seedlings**

232 We measured the regulatory effects of the MLKs on proteome dynamics by tandem mass tag  
233 (TMT) labeling combined with high pH reversed-phase fractionation and tandem mass  
234 spectrometry (**Fig. 1**). Wild-type and *mlk* mutant *Arabidopsis* seedlings were entrained under 12  
235 h light and 12 h dark conditions. We compared *mlk1/2/3* and *mlk1/3/4* mutant seedlings, as we  
236 were unable to isolate viable *mlk1/2/3/4* mutant seed (Huang et al., 2016; Liu et al., 2017). This  
237 mutant combination will allow us to assess potential redundancy within the MLK family and  
238 facilitate the identification of *mlk2* or *mlk4* specific changes. As the MLKs are associated with  
239 light-signaling pathways, we collected tissue either immediately before lights off [Zeitgeber 12,  
240 (ZT12)] or after 2h of dark (ZT14). We identified nearly 50,000 peptides combined, mapping to  
241 over 7,500 protein groups at both ZT12 and ZT14. Pairwise comparisons between *mlk* mutants  
242 and wild type identified peptides showing altered abundance in the *mlk* mutant backgrounds at

243 both the ZT12 and ZT14 time-points (**Supplemental Dataset S1**). Peptides were classified as  
244 altered in abundance if both the  $\log_2$  FC was at least  $\pm 1$  (2 fold-change) and the p-value  $< 0.05$ .  
245 Only 13 unique proteins met our altered abundance criteria in the *mlk1/2/3* mutant when  
246 compared to wild type at both ZT12 and ZT14 (**Fig. 2 and Supplemental Table S1**). In the  
247 *mlk1/3/4* mutant background, more than 225 peptides mapping to over 110 unique proteins met  
248 our altered abundance threshold at ZT12 and ZT14 when compared to wild type (**Fig. 2 and**  
249 **Supplemental Table S1**). These results suggest that the *mlk1/3/4* mutant combination has a  
250 greater impact on the global proteome than the *mlk1/2/3* mutant combination at the light-to-dark  
251 transition.

252 *In silico* classification using Gene Ontology (GO) analysis (<https://biit.cs.ut.ee/gprofiler/>) revealed  
253 that proteins exhibiting altered abundance were associated with biotic and abiotic stresses (**Fig.**  
254 **3**). To simplify the enriched GO term lists and focus on the most relevant terms, we performed  
255 additional analysis using REVIGO (default settings, dispensability threshold = 0.7) to remove  
256 functionally redundant terms (Supek et al., 2011). We found increased abundance of proteins  
257 involved in glucosinolate biosynthesis (GO:0019761) and related processes (GO:1901659,  
258 GO:0016143, and GO:0044272) in *mlk1/3/4* mutant seedlings at ZT12 and in both *mlk1/2/3* and  
259 *mlk1/3/4* mutant seedlings at ZT14 (**Fig. 3**). Nearly 75% of the peptides with an increased  
260 abundance of 3-fold or greater in the *mlk1/3/4* mutant seedlings at ZT14 mapped to proteins  
261 directly involved in glucosinolate biosynthesis (**Supplemental Dataset S1**). These proteins  
262 include enzymes responsible for the early reactions leading to methionine-derived glucosinolates  
263 (branched-chain aminotransferase 4 (BCAT4) and methylthioalkylmalate synthase 1 (MAM1)) as  
264 well as, desulfo-glucosinolate sulfotransferase 17 and 18 (SOT17 and SOT18), which are  
265 involved in the final step of glucosinolate core structure biosynthesis (Sønderby et al., 2010).  
266 Other proteins involved in glucosinolate biosynthesis that showed increased abundance in  
267 *mlk1/3/4* mutants compared to wild type include isopropylmalate dehydrogenase 1 (IMD1),

268 iospropylmaate isomerase 2 (IPMI2), 2-isopropylmalate synthase 2 (IMS2), flavin-  
269 monooxygenase glucosinolate S-oxygenase 1 (FMO GS-OX1) and the cytochrome P<sub>450</sub> proteins  
270 CYP83A1 and CYP79F1 (**Supplemental Dataset S1**). Proteins involved in glucosinolate  
271 catabolism, such as glucoside glucohydrolase 2 (TGG2), nitrile specifier protein 1 (NSP1), and  
272 beta glucosidase 34 and 35 (BGLU34 and BGLU35) were decreased in abundance in *mlk1/3/4*  
273 mutant seedlings at ZT12 compared to wild type.

274 To begin testing the hypothesis that MLKs are involved in the regulation of glucosinolate  
275 metabolism, we quantified glucosinolate levels at the end of day (ZT12) when GLS levels peak  
276 (Huseby et al., 2013). Total GLSs were extracted from whole seedlings and analyzed by HPLC.  
277 Peaks corresponding to individual GLSs were identified by comparison with published UV  
278 absorbance spectra and expected retention times, and the identities were further validated using  
279 LC-MS/MS. These analyses revealed an increase in aliphatic glucosinolates (Met-derived) in both  
280 *mlk1/2/3* and *mlk1/3/4* mutant seedlings compared to wild type. In contrast, the levels of indolic  
281 glucosinolates (Trp-derived) remained unchanged in the mutant backgrounds (**Fig. 4**).  
282 Interestingly, the first seven glucosinolates originating from the earliest steps in the Met-derived  
283 glucosinolate biosynthetic pathway were increased 2- to 4-fold over wild type (**Fig. 4**), a pattern  
284 which correlates with the increased abundance of glucosinolate-associated biosynthetic enzymes  
285 (BCAT4, MAM1, SOT17/18, etc.) in the *mlk* mutants. Together these findings support a role for  
286 the MLKs in early stages of aliphatic glucosinolate biosynthesis and overall glucosinolate  
287 metabolism.

288 In addition to glucosinolate biosynthetic enzymes, several proteins involved in hormone signaling  
289 and diverse stress responses changed in abundance in *mlk1/3/4* mutant seedlings compared to  
290 wild type at either ZT12 or ZT14, including BRI1-EMS-SUPPRESSOR 1 (BES1), SUPER  
291 SENSITIVE TO ABA AND DROUGHT2 (SAD2), CORONATINE INDUCED 1 (CORI3),  
292 pathogenesis-related gene 5 (PR5), lipoxygenase 2 (LOX2), thylakoidal ascorbate peroxidase

293 (TAPX), and cold regulated 15a and b (COR15A and COR15B). Peptides mapping to the blue  
294 light receptor cryptochrome 2 (CRY2) also increased 2-fold in the *mlk1/3/4* mutant when  
295 compared to wild type at ZT12 (**Supplemental Dataset 1**). These observations are in agreement  
296 with the role of MLKs in hormone signaling, stress response, and light signaling (Liu et al., 2017;  
297 Dai and Xue, 2010; Casas-Mollano et al., 2008; Ni et al., 2017; Chen et al., 2018).

## 298 **Quantitative Phosphoproteomic Comparisons of *mlk* Mutants**

299 The MLKs physically interact with and phosphorylate important regulatory proteins (Liu et al.,  
300 2017; Chen et al., 2018; Dai and Xue, 2010; Ni et al., 2017). Thus, we characterized the  
301 phosphoproteome of wild-type, *mlk1/2/3*, and *mlk1/3/4* mutant seedlings in the light (ZT12) and  
302 after transition to dark (ZT14) to gain insight into the role of the MLKs in global phosphorylation.  
303 We applied a TiO<sub>2</sub> based phosphopeptide enrichment technique to the TMT-10plex labeled  
304 samples described above to achieve an in-depth phosphoproteomic analysis using the Thermo  
305 Scientific Orbitrap Fusion Lumos Tribrid mass spectrometer (**Fig. 1**). Byonic software, run as a  
306 node within the Proteome Discover V2.1 platform identified and derived the relative quantitation  
307 of phosphoproteins. Using this strategy, we identified a combined total of 23,386 phosphosites on  
308 15,222 unique peptides mapping to 4,854 protein groups at ZT12 and slightly fewer at ZT14  
309 (19,947 phosphosites on 12,818 unique peptides mapping to 4,467 protein groups). At ZT12, over  
310 80% of the identified phosphosites were serine residues, approximately 15% were threonine, and  
311 less than 2% were tyrosine (**Fig. 5A**), which is consistent with phosphosite distributions previously  
312 reported for Arabidopsis (Champion et al., 2004; Sugiyama et al., 2008). The phosphosite residue  
313 distributions were similar at ZT14 (**Figure 5A**).

314 We performed *mlk*-to-WT pairwise comparisons for each time point (**Supplemental Table S1 and**  
315 **Dataset S2**) to identify peptides that showed altered phosphorylation in the absence of the MLKs  
316 at either ZT12 or ZT14. We considered peptides differentially phosphorylated if they had a  
317 minimum log<sub>2</sub> FC of  $\pm 0.585$  (1.5 fold-change) and a p-value < 0.05. We identified 113

318 phosphopeptides corresponding to 93 unique protein groups that met the cutoff in the *mlk1/2/3*  
319 ZT12 set. In the *mlk1/3/4* ZT12 set, 429 phosphopeptides corresponding to 284 unique proteins  
320 were differentially phosphorylated, a 300% increase (**Fig. 5B**). 170 and 274 phosphopeptides,  
321 corresponding to 149 and 215 unique protein groups, have altered phosphorylation in the *mlk1/2/3*  
322 ZT14 and *mlk1/3/4* ZT14 analysis, respectively (**Figure. 5B and Supplemental Table S1**). The  
323 phosphosite residue distribution was similar in all datasets analyzed (**Figure 5A**). These data  
324 show that the *mlk1/3/4* mutant combination has a larger impact on the phosphoproteome than the  
325 *mlk1/2/3* mutant combination at each time point, particularly at ZT12. This observation supports  
326 a role for MLK4 in regulating the phosphoproteome in a light-dependent manner, likely through  
327 MLK4 phosphorylating blue light photoreceptors and red-light signaling pathway transcription  
328 factors (Liu et al., 2017; Ni et al., 2017).

329 Over 50% (48 out of 93) of the differentially phosphorylated proteins identified in the *mlk1/2/3*  
330 ZT12 set were present in the *mlk1/3/4* ZT12 set. In contrast, over 80% of those identified in the  
331 *mlk1/3/4* ZT12 set were specific to the *mlk1/3/4* mutant (**Fig. 5C**). When comparing the ZT14 sets,  
332 42 phosphoproteins were shared, accounting for 28% and 19.5% of the proteins identified in the  
333 *mlk1/2/3* ZT14 and *mlk1/3/4* ZT14 sets, respectively (**Fig. 5D**). Many of the proteins shared  
334 between *mlk1/2/3* and *mlk1/3/4* protein sets are involved in gene silencing and chromatin  
335 organization (**Supplemental Dataset S2**), supporting a conserved role for the MLK family kinases  
336 in these processes (Casas-Mollano et al., 2008; Jeong Br et al., 2002). Some of these proteins,  
337 including SUO and SERRATE (SE) – which are involved in microRNA biogenesis pathways,  
338 exhibit altered phosphopeptide abundance at both ZT12 and ZT14. However, proteins involved  
339 in chromatin organization, such as Increased in Bonsai Methylation 1 (IBM1) and SPLAYED  
340 (SYD), only showed altered phosphorylation in both *mlk1/2/3* and *mlk1/3/4* mutant backgrounds  
341 at ZT12 (**Supplemental Dataset S2**). These results suggest that the MLKs are involved in  
342 regulating gene expression, possibly through modulating light-dependent chromatin organization.

## 343 **MLKs Influence Diverse Kinase Signaling Networks**

344 The proteins identified as differentially phosphorylated in the *mlk1/3/4* mutant background at both  
345 ZT12 and ZT14 are associated with a diverse set of biological processes, suggesting a possible  
346 disruption of multiple protein kinase networks. Motif-X ([http://motif-x.med.harvard.edu/motif-](http://motif-x.med.harvard.edu/motif-x.html)  
347 [x.html](http://motif-x.med.harvard.edu/motif-x.html)); (Chou and Schwartz, 2011; Schwartz and Gygi, 2005) was used to isolate  
348 overrepresented sequence motifs present in the phosphopeptide sets that are associated with  
349 known kinase families. Following extension of differentially phosphorylated high-confidence,  
350 unambiguous peptides using PEPTIDEXTENDER ver.0.2.2 alpha  
351 (<http://schwartzlab.uconn.edu/pepextend>), the resulting 15-mers were submitted for motif  
352 analysis using a significance threshold of  $p < 10^{-6}$  and a minimum occurrence requirement of 20.  
353 Peptides exhibiting increased or decreased abundance when compared to wild type were  
354 analyzed separately. Three serine phosphorylation (Sp) motifs (S-x-x-K, R-x-x-S, and K-x-x-S)  
355 were overrepresented in peptides that were decreased in abundance at ZT12 in the *mlk1/3/4*  
356 mutant seedling background (**Fig. 6A**). The K-x-x-S motif, along with an acidic S-type motif (S-x-  
357 x-x-x-E), was also overrepresented at ZT14 in *mlk1/3/4* mutants (**Fig. 6B**). The CDPK-SnRK  
358 superfamily of protein kinases is known to recognize R/K-x-x-S/T basic motifs. The R-x-x-S motif  
359 has also been associated with the AGC family kinases, PKA and PKC (Rademacher and Offringa,  
360 2012; Maronedze et al., 2016), which are involved in mid- to late-day rhythmic phosphorylation  
361 (Choudhary et al., 2015). The kinase(s) responsible for phosphorylation at the S-x-x-K site in  
362 plants is unknown. However, the highly conserved eukaryotic cyclin B-dependent protein kinase  
363 Cdk1 that recognizes several non-S/T-P motifs, including the S/T-x-x-R/K motif, is a candidate  
364 (Suzuki et al., 2015). The classical minimal motif required for recognition by proline-directed  
365 kinases families (mitogen-activated protein kinase (MAPK), cyclin-dependent kinase (CDK), and  
366 glycogen synthase kinase 3 (GSK-3)), S-P, was found to be overrepresented in peptides that  
367 were increased in abundance in *mlk1/3/4* mutants at ZT12 and ZT14. While the S-x-S motif, which

368 is associated with the receptor-like protein kinase (RLK) family (van Wijk et al., 2014), was only  
369 found to be overrepresented at ZT12 (**Fig. 6**). Using these parameters, there were no  
370 overrepresented motifs identified from the sites that decreased in abundance in either of the  
371 *mlk1/2/3* data sets. However, if we reduced the minimum occurrence to 10, then the R-x-x-S and  
372 S-P motifs were overrepresented in peptides with decreased or increased abundance at ZT12 in  
373 *mlk1/2/3* mutants (**Supplemental Figure S2**). The diversity of identified overrepresented kinases  
374 motifs suggests that MLK family kinases influence numerous biological processes through  
375 systemic regulation of multiple kinase signaling networks.

### 376 **MLKs Influence the Phosphorylation Status of Nuclear Localized Proteins**

377 Using g:Profiler (<https://biit.cs.ut.ee/gprofiler/>), 149 GO terms were enriched in the differentially  
378 phosphorylated proteins from the *mlk1/3/4* ZT12 set; 107 of these were classified as biological  
379 process, 34 as cellular component, and 5 as molecular function. Forty-nine terms were enriched  
380 in the *mlk1/3/4* ZT14 set, 28 in biological process and 21 in cellular component. Fewer terms were  
381 found to be enriched in the *mlk1/2/3* phosphoprotein sets, with only 8 enriched terms at ZT12 and  
382 18 at ZT14. A complete list of enriched GO terms can be found in **Supplemental Dataset S2**.  
383 Functionally redundant terms were removed using REVIGO (default settings, dispensability  
384 threshold = 0.7 (cellular component) or 0.5 (biological process); **Supplemental Tables S2-3**;  
385 (Supek et al., 2011)). Under the cellular component category, there was strong enrichment for  
386 terms associated with the nucleus: 'nucleus' (GO:0005634), 'nuclear part' (GO:0044428), and  
387 'nucleoplasm' (GO:0005654). Terms including 'chromosome' (GO:0005694), 'chromosomal part'  
388 (GO:0044427), and 'chromatin' (GO:0000785) were also found to be enriched in at least one of  
389 the differentially phosphorylated protein lists (**Fig. 7A**). These results are in agreement with the  
390 known nuclear localization of the MLKs, and their role in modifying chromatin (Wang et al., 2015a;  
391 Huang et al., 2016; Su et al., 2017).



## 392 **Circadian-Associated Proteins Exhibit Altered Phosphorylation in *mlk1/3/4* Mutant** 393 **Seedlings**

394 The *mlk1/3/4* ZT12 differentially phosphorylated protein set was enriched in proteins associated  
395 with rhythmic processes (GO:0048511) and/or circadian rhythms (GO:0007623). These  
396 observations agree with previous reports linking the MLKs to light signaling and circadian  
397 regulation (Huang et al., 2016; Ni et al., 2017; Liu et al., 2017; Su et al., 2017; Zheng et al., 2017).  
398 The core circadian clock proteins PSEUDO-RESPONSE REGULATOR 7 (PRR7), TIME FOR  
399 COFFEE (TIC), and REVEILLE 8 (RVE8) were all differentially phosphorylated in the *mlk1/3/4*  
400 mutant background at ZT12 (**Table 1 and Supplemental Table S3**). We observed decreased  
401 phosphorylation of TIC at S324 and PRR7 at S355 and S275, while RVE8 showed increased  
402 phosphorylation of the C-terminal half (**Table 1**). The red-light photoreceptor phytochrome B  
403 (PHYB) and the transcriptional master regulator ELONGATED HYPOCOTYL 5 (HY5) also  
404 showed reduced phosphorylation at Threonine 42 and T64, respectively (**Table 1**); to the best of  
405 our knowledge, these phosphosites are previously unreported. **Table 1** lists additional circadian-  
406 associated proteins with altered phospho-abundance in the *mlk1/3/4* mutant at ZT12.

## 407 **Gene Ontology Analysis Reveals Enrichment of Proteins Involved in Chromatin** 408 **Organization**

409 Due to the large number of enriched GO terms identified from both the *mlk1/3/4* ZT12 and  
410 *mlk1/3/4* ZT14 list, the dispensability threshold was reduced to 0.5 for REVIGO analysis. This  
411 resulted in the identification of 34 and 15 representative and non-redundant enriched biological  
412 process terms in *mlk1/3/4* ZT12 and *mlk1/3/4* ZT14 altered phosphoprotein lists, respectively.  
413 Enriched GO terms and their underlying gene identifiers shared between the *mlk1/3/4* ZT12 and  
414 ZT14 sets included, 'organic cyclic compound metabolism', GO:1901360, 'nitrogen compound  
415 metabolism', GO:0006807, 'chromosome organization', GO:0051276 and 'negative regulation of  
416 gene expression' GO:0006807 (**Fig. 7B-C and Supplemental Table S3**). The chromatin

417 modifying proteins BRAHMA (BRM), SIN3-like3 (SNL3), vernalization5/VIN3-like (VEL1), and  
418 high mobility ground B1 (HMGB1) were shared amongst these GO terms. Additional proteins  
419 associated with chromatin modifications were present in the *mlk1/3/4* ZT12 list including the  
420 histone methyltransferase EARLY FLOWERING IN SHORT DAYS (EFS)/SET DOMAIN GROUP  
421 8 (SDG8), the histone acetyltransferase TBP-ASSOCIATED FACTOR 1 (TAF1), as well as IBM1,  
422 actin-related protein 4 (ARP4), alfin-like 7 (AL7), GLIOMAS 41 (GAS41/YAF9a), and stress-  
423 induced histone H2A protein 9 (HTA9). Few biological process GO-terms were found to be  
424 enriched in the *mlk1/2/3* data sets. Nevertheless, those that were ('regulation of gene expression',  
425 'epigenetic' (ZT12) and 'chromosome organization', 'chromatin organization' and 'mitotic sister  
426 chromatid cohesion' (ZT14)) were also enriched in the *mlk1/3/4* protein list (**Supplemental**  
427 **Dataset S2**). These results support a role for the MLKs in regulating chromatin organization and  
428 gene expression at the assessed time points.

#### 429 ***mlk1/3/4* Mutants Show Altered Phosphorylation of Proteins Involved in Nuclear** 430 **Organization and DNA Damage Response**

431 Analysis of differentially phosphorylated peptides has shown that the loss of *mlk1*, *mlk3*, and *mlk4*  
432 at ZT12 has the greatest impact on both the global- and phosphoproteome. Therefore, we chose  
433 to expand on our analysis exclusively for the *mlk1/3/4* ZT12 data set. To elucidate further the  
434 biological processes influenced by the MLKs at the end of the day (ZT12), we independently  
435 analyzed the phosphoproteins that were increased or decreased in abundance. Of the 429  
436 phosphopeptides found to have altered abundance in the *mlk1/3/4* mutant background at ZT12  
437 (**Supplemental Dataset S2**), 133 were increased and 296 were decreased in abundance,  
438 mapping to 103 increased and 190 decreased unique proteins. Interestingly, 9 gene identifiers  
439 were shared between the increased and decreased groups, including several that are involved in  
440 various aspects of nuclear organization such as LITTLE NUCLEI 1/ CROWED NUCLEI 1  
441 (LINC1/CRWN1), VEL1, and HMGB1 (**Fig. 8A and Supplemental Dataset 2**). Proteins that were

442 increased in abundance were associated with the representative GO-terms ‘response to organic  
443 substance’ (GO:0010033) and ‘response to stimulus’ (GO:0050896) (**Fig. 8B**). However, we  
444 found that the majority of GO terms enriched in the inclusive set (both increased and decreased  
445 peptides) such as ‘RNA processing’ (GO:0006396), ‘chromosome organization’ (GO:0051276),  
446 and ‘developmental processes’ (GO:0032592) are associated with decreased phosphorylation  
447 (**Fig. 8C**). The GO term ‘cellular response to DNA damage stimulus’ (GO:0006974), was also  
448 enriched in proteins exhibiting decreased phosphorylation. Proteins associated with this term  
449 include a catalytic subunit of DNA polymerase alpha INCARVATA2 (ICU2), as well as X-ray cross  
450 complementation group4 (XRCC4) and MUTM homolog-1 (MMH-1) both of which are directly  
451 involved in DNA repair (West et al., 2000; Ohtsubo et al., 1998; Barrero et al., 2007).

#### 452 ***mlk* Mutants Show Increased Sensitivity to DNA-damaging Agents**

453 Nuclear organization and chromatin dynamics strongly influence DNA damage repair efficacy  
454 (Reviewed in Vergara and Gutierrez, 2017; Donà and Mittelsten Scheid, 2015). Additionally, the  
455 *Chlamydomonas* MLK orthologue, Mut9, is required for survival when grown in the presence of  
456 genotoxic agents (Jeong Br et al., 2002). Since many of the proteins exhibiting changes in  
457 phosphorylation abundance in the *mlk1/3/4* mutants at ZT12 are proteins associated with nuclear  
458 organization (LINC/CRWN family members, SAD1/UNC-84 domain protein 2 (SUN2), BRM, and  
459 SYD) and DNA damage, we further explored what role the *Arabidopsis* MLKs might play in DNA  
460 damage response. To do so, we evaluated the sensitivity of mutant and wild-type seedlings to the  
461 genotoxic agent methyl methane sulfonate (MMS) and UV-C. MMS is a monofunctional DNA  
462 alkylating agent that induces replication fork stalling and subsequent double strand breaks  
463 (Ensminger et al., 2014). In addition to the *mlk1/2/3* and *mlk1/3/4* mutants, the *mlk4* single and  
464 *mlk* quadruple amiRNA line (amiR<sup>4k</sup>) (Liu et al., 2017) were included in our analysis.

465 Mutant and wild-type seedlings were imaged and weighed after fourteen days of exposure to  
466 titrations of MMS. All genotypes showed reduced aerial mass with increasing levels of MMS, with

467 the *mlk* mutants showing increased sensitivity compared to wild type (**Fig. 9A-B**). In wild-type  
468 seedlings, growth was reduced by less than 10% (fresh weight) in the presence of 50 ppm MMS  
469 compared to the mock-treated seedlings. The *mlk4* single mutant seedlings showed more than  
470 20% reduction of fresh weight, the *mlk1/3/4* seedlings a 39%, and *amiR<sup>4k</sup>* lines a 44% reduction,  
471 compared to the mock-treated seedlings (**Fig. 9B**). The *mlk1/3/4* and *amiR<sup>4k</sup>* mutants continued  
472 to decline in fresh weight at higher concentrations of MMS. At 100 ppm MMS, *mlk1/2/3* seedlings  
473 showed approximately a 10% greater reduction in fresh weight than what was observed for wild  
474 type (**Fig. 9B**). In addition to stunted growth, chlorotic tissue was observed in the *mlk1/3/4* mutants  
475 growing on 50 ppm MMS and in the *amiR<sup>4k</sup>* mutants at 75 PPM MMS (**Fig. 9A**). 150 ppm MMS  
476 caused severe growth reduction and lethality in all assessed genotypes; thus, seedlings were  
477 imaged but not weighed (**Fig. 9A**). Next, we assessed seedling germination and growth in the  
478 continuous presence of 150 ppm MMS. Post-germination growth was severely impaired in the  
479 *mlk1/3/4* mutant, with more than 65% of seedlings exhibiting complete developmental arrest  
480 compared to approximately 10% of wild-type seedlings (**Fig. 9C-D**). In contrast, the *amiR<sup>4k</sup>* mutant  
481 seedlings developed similar to wild-type seedlings when germinated in the presence of 150 ppm  
482 MMS (**Fig. 9C-D**), which could be a result of near endogenous expression levels of MLK2 and  
483 MLK3 (Ni 2017).

484 We also tested the *mlk* mutants for sensitivity to UV-induced DNA damage through periodic  
485 exposure to multiple doses of UV-C irradiation. The phenotypic impact of chronic irradiation with  
486 either 2000 or 4000 J m<sup>-2</sup> on seedlings was evaluated five days after a recovery period. All  
487 genotypes had cotyledon cell death and reduced growth after exposure to both doses of UV-C.  
488 However, only *mlk1/3/4* mutant seedlings showed tissue chlorosis after exposure to both 2000  
489 and 4000 J m<sup>-2</sup> UV-C. *amiR<sup>4k</sup>* mutants had minimal chlorosis after irradiation with 4000 J m<sup>-2</sup> (**Fig.**  
490 **9E**). Taken together, these data suggest that *mlk* mutants have increased sensitivity to DNA  
491 damage.

## 492 Discussion

### 493 MLK protein kinases alter protein phosphorylation in developmental and stress responsive 494 pathways

495 The current repertoire of MLK substrates is composed of a photoreceptor, multiple transcription  
496 factors, hormone receptors, and histones (Ni et al., 2017; Liu et al., 2017; Dai and Xue, 2010;  
497 Chen et al., 2018; Casas-Mollano et al., 2008; Su et al., 2017; Kang et al., 2020; Wang et al.,  
498 2015a). MLK mutants have defects in circadian period length, hypocotyl elongation, flowering  
499 time, osmotic stress responses, seed set, chromatin organization, and hormone sensitivity (Su et  
500 al., 2017; Casas-Mollano et al., 2008; Liu et al., 2017; Huang et al., 2016; Zheng et al., 2017;  
501 Chen et al., 2018; Kang et al., 2020). These observations support a model where MLK family  
502 members function as central regulators of numerous interconnected signaling pathways. Our  
503 quantitative analysis of the global- and phosphoproteomes of *mlk* triple mutant seedlings supports  
504 a diverse and complex role for the MLKs in the regulation of cellular signaling and response.  
505 Interestingly, these kinases seem to share a balance of functional redundancy and substrate  
506 specificity, which for example, results in opposing circadian period and hypocotyl elongation  
507 phenotypes (Huang et al., 2016; Liu et al., 2017). We found the *mlk1/3/4* mutant displays a much  
508 more severe proteomic phenotype relative to the *mlk1/2/3* mutant, with over 10-fold more proteins  
509 showing altered abundance in the *mlk1/3/4* mutant (**Fig. 2**). This increase holds for the  
510 phosphoproteome as well. However, the difference was greatest in tissue sampled in the light.  
511 An explanation for the light dependence could be the result of MLK4 acquiring substrate specificity  
512 or MLK4 having a greater tendency than other MLKs for interacting with light-signaling proteins in  
513 planta. MLK4 has a higher affinity for PIF3 when compared to other MLKs (Ni et al., 2017), and  
514 both phyB and HY5 have altered phosphorylation only at ZT12 in the *mlk1/3/4* mutants (**Table 1**).  
515 While some proteins with altered abundance were unique to the *mlk1/3/4* or *mlk1/2/3* mutants,  
516 shared targets include glucosinolate biosynthesis (global proteome; **Fig. 3**) and chromosome

517 organization (phosphoproteome; **Fig. 7B-C and Supplemental Dataset S2**). Further work is  
518 needed to determine if any of the proteins showing altered phosphorylation are direct substrates  
519 of the MLKs, or whether changes in phosphorylation status is occurring indirectly through  
520 additional kinases.

## 521 **MLKs Regulate Hormone Signaling and Stress Responses**

522 Several proteins responsible for glucosinolate metabolism showed altered abundance in *mlk*  
523 mutant seedlings before and after dark transition (**Fig. 3 and Supplemental Dataset S1**).  
524 Glucosinolates are nitrogen- and sulfur-containing secondary metabolites known for their role in  
525 plant defense (Kim et al., 2008; Kos et al., 2012; Bednarek et al., 2009; Clay et al., 2009) and  
526 anticarcinogenic properties (Higdon et al., 2007). Accumulation of glucosinolates in *Arabidopsis*  
527 *thaliana* is rhythmic, controlled in part by circadian clock regulated jasmonate accumulation and  
528 the activity of the basic leucine zipper (bZIP) transcription factor, ELONGATED HYPOCOTYL 5  
529 (HY5) (Goodspeed et al., 2012; Huseby et al., 2013). HY5 is a positive regulator of light signaling  
530 and functions as a central regulator of light-dependent growth and development by integrating  
531 various environmental signals (Gangappa and Botto, 2016). Peak glucosinolate levels occur  
532 during the day, possibly to protect against rhythmic herbivory. Two glucosinolate biosynthesis  
533 genes that showed increased protein abundance in *mlk* mutants, *CYP79F1* and *SOT18*, are  
534 expressed at lower levels in the *hy5* mutant background (Huseby et al., 2013). The  
535 phosphorylation of HY5 is associated with its activity and stability, with the non-phosphorylated  
536 form being more active (Hardtke, 2000). Thus, it is possible that increased HY5 activity, resulting  
537 from decreased phosphorylation in the *mlk* mutant background, could be influencing glucosinolate  
538 metabolism. Additionally, abscisic acid (ABA) induces glucosinolate accumulation in plants (Wang  
539 et al., 2015b; Zhu and Assmann, 2017). MLK3 regulates ABA signaling through the  
540 phosphorylation of the PYR/PYL ABA receptor family of proteins (Chen et al., 2018). In agreement  
541 with altered ABA signaling, increased phosphorylation of proteins associated with ABA responses

542 and the SnRK consensus motif, R/K-x-x-S/T, was found to overrepresented in the *mlk1/3/4* mutant  
543 background. Thus, the MLKs may be involved in the regulation of defense responses through  
544 multiple converging signaling pathways.

### 545 **The Phosphorylation Status of Key Circadian and Light Signaling Components Are Altered** 546 **in the Absence of MLK Family Kinases**

547 Several differentially phosphorylated proteins that are involved in chromatin organization also  
548 function as core circadian clock components (RVE8) or are central regulators of clock input  
549 pathways such as temperature and light signaling (phyB and HY5). RVE8 is a MYB-like  
550 transcription factor that regulates the expression of the clock gene *TIMING OF CAB*  
551 *EXPRESSION1 (TOC1)* by promoting histone 3 (H3) acetylation of its promoter (Farinas and Mas,  
552 2011). RVE8 shares structural similarity to the core clock transcription factors CCA1 and LATE  
553 ELONGATED HYPOCOTYL (LHY). Phosphorylation of CCA1 by the Ser/Thr protein kinase CK2  
554 antagonistically regulates CCA1 transcriptional activity by reducing its ability to bind to the  
555 promoters of clock gene targets, which in turn alters circadian period (Portolés and Más, 2010).  
556 Further exploration of the impact of RVE8 phosphorylation could reveal a new avenue of post-  
557 translation regulation of the circadian clock.

558 Temperature and light signaling are critical circadian inputs that allow plants to coordinate growth  
559 and development (e.g., germination and photoperiodic flowering) with their environment. The  
560 phyB photoreceptor is central to both temperature and light signaling pathways (Legris et al.,  
561 2016). PhyB activity is regulated in part by phosphorylation of its N-terminus (Medzihradzky et  
562 al., 2013; Nito et al., 2013). Altered phospho-status of phyB Ser86 and Y104 influences phyB rate  
563 dark-reversion rates, hypocotyl elongation, and flowering time in Arabidopsis (Hajdu et al., 2015;  
564 Medzihradzky et al., 2013; Nito et al., 2013). Here we report decreased phosphorylation of a  
565 previously unidentified phyB N-terminal phosphosite, T42, in the *mlk* mutant background at ZT12  
566 (**Table 1**). MLKs are known to associate with phyB, phosphorylate the phytochrome–interacting

567 factor, PIF3, and display a variety of red-light dependent growth phenotypes (Ni et al., 2017;  
568 Huang et al., 2016). In addition to the well-established light-induced phyB-PIF signaling cascade,  
569 there is an ample amount of evidence supporting the role of phyB in large-scale chromatin  
570 organization (van Zanten et al., 2010; Tessadori et al., 2009). Thus, the MLK-phyB interaction  
571 may contribute to light-dependent chromatin re-organization in addition to regulating PIF3  
572 turnover. We also found decreased phosphorylation of another key light signaling component,  
573 HY5 at T64. Whether the phosphorylation of HY5<sup>T64</sup> and/or phyB<sup>T42</sup> is directly or indirectly  
574 influenced by the MLKs and how those phosphosites fit into the existing light signaling paradigm  
575 will be an exciting line of future research.

## 576 **The Role of MLK Family Kinases in Modulating Nuclear Architecture**

577 The role of histone modifications in the regulation of developmental processes and stress  
578 response has been well-established, yet our understanding of the responsible modifiers,  
579 modification crosstalk, and targeted genes is incomplete (Probst and Mittelsten Scheid, 2015;  
580 Rosa and Shaw, 2013). Early observations have implicated the MLK family in the regulation of  
581 environmentally-stimulated chromatin organization. MLK1, like its *Chlamydomonas* homologue  
582 MUT9, has been shown to phosphorylate histone H3 on threonine 3 (H3T3p) and to function  
583 redundantly with MLK2 to promote H3T3p in response to salt stress (Wang et al., 2015a; Casas-  
584 Mollano et al., 2008). Accordingly, the *mlk1mlk2* double mutant has abnormal chromatin  
585 organization and increased sensitivity to osmotic stress (Wang et al., 2015a). Comparisons have  
586 been drawn between the defects in chromosomal organization observed in the *mlk1mlk2* mutants  
587 and those occurring in plants harboring mutations in members of the LITTLE NUCLEI/CROWDED  
588 NUCLEI (LINC/CRWN) gene family, which are involved in controlling nuclear size and  
589 heterochromatin organization (Wang et al., 2013; Sakamoto and Takagi, 2013). Our analysis of  
590 the *mlk* mutant phosphoproteomes found that peptides mapping to multiple members of the



591 LINC/CRWN family were altered in abundance in *mlk1/2/3* and *mlk1/3/4* mutants, suggesting that  
592 MLKs may influence nuclear organization in part through regulation of the LINC proteins.

### 593 **MLKs Are Involved in DNA Damage Repair Through Multiple Pathways**

594 Plants are exposed to DNA-damage from their external environment (e.g., ultraviolet light, ionizing  
595 radiation, heat stress, and bacterial and fungal toxins) as well as endogenous sources such as  
596 DNA-alkylating metabolic byproducts. Maintenance of genomic integrity requires an efficient DNA  
597 damage repair (DDR) system that can identify, access, remove, and reassemble damaged  
598 genomic regions within the context of chromatin. Mutations in genes involved in chromatin  
599 organization and remodeling often exhibit defects in DDR and enhanced susceptibility to DNA  
600 damaging reagents (Donà and Mittelsten Scheid, 2015). The increased sensitivity of *mlk* mutants  
601 to DNA damaging agents could result from the dysregulation of proteins involved in chromatin  
602 remodeling, such as GAS41/YAFa, ARP4, BRM, and SYD (**Fig. 9**). The *mlk1/3/4* mutant also  
603 shows altered phosphorylation of several proteins directly involved in DDR, such as MMH-1 and  
604 XRCC4 (Yuan et al., 2014; Roy et al., 2013). Additionally, there is accumulating evidence  
605 supporting a role for small regulatory RNAs in DDR (Hawley et al., 2017); proteins associated  
606 with small RNA metabolism are enriched in *mlk1/3/4* at ZT12 (**Fig. 7**). There is no question that  
607 full elucidation and validation of the mechanisms linking MLKs and DDR will require further  
608 exploration. However, taken together, our data suggests the MLKs play an important role in  
609 mitigating DNA damage through the regulation of multiple response pathways.

610

611

612

613

614 **References**

- 615 **Barrero, J.M., Gonzalez-Bayon, R., del Pozo, J.C., Ponce, M.R., and Micol, J.L.** (2007).  
616 INCURVATA2 Encodes the Catalytic Subunit of DNA Polymerase and Interacts with  
617 Genes Involved in Chromatin-Mediated Cellular Memory in *Arabidopsis thaliana*. *PLANT*  
618 *CELL ONLINE*.
- 619 **Bednarek, P., Piślewska-Bednarek, M., Svatoš, A., Schneider, B., Doubský, J.,**  
620 **Mansurova, M., Humphry, M., Consonni, C., Panstruga, R., Sanchez-Vallet, A.,**  
621 **Molina, A., and Schulze-Lefert, P.** (2009). A Glucosinolate Metabolism Pathway in Living  
622 Plant Cells Mediates Broad-Spectrum Antifungal Defense. *Science* (80-. ). **323**: 101 LP –  
623 106.
- 624 **Casas-Mollano, J.A., Jeong, B.-R., Xu, J., Moriyama, H., and Cerutti, H.** (2008). The MUT9p  
625 kinase phosphorylates histone H3 threonine 3 and is necessary for heritable epigenetic  
626 silencing in *Chlamydomonas*. *Proc. Natl. Acad. Sci. U. S. A.*
- 627 **Champion, A., Kreis, M., Mockaitis, K., Picaud, A., and Henry, Y.** (2004). *Arabidopsis*  
628 kinome: After the casting. *Funct. Integr. Genomics*.
- 629 **Chen, H.-H., Qu, L., Xu, Z.-H., Zhu, J.-K., and Xue, H.-W.** (2018). EL1-like Casein Kinases  
630 Suppress ABA Signaling and Responses by Phosphorylating and Destabilizing the ABA  
631 Receptors PYR/PYLs in *Arabidopsis*. *Mol. Plant* **11**: 706–719.
- 632 **Chou, M.F. and Schwartz, D.** (2011). Biological sequence motif discovery using motif-x. *Curr*  
633 *Protoc Bioinforma.*
- 634 **Choudhary, M.K., Nomura, Y., Wang, L., Nakagami, H., and Somers, D.E.** (2015).  
635 Quantitative Circadian Phosphoproteomic Analysis of *Arabidopsis* Reveals Extensive Clock  
636 Control of Key Components in Physiological, Metabolic, and Signaling Pathways. *Mol. Cell*.

- 637 Proteomics.
- 638 **Clay, N.K., Adio, A.M., Denoux, C., Jander, G., and Ausubel, F.M.** (2009). Glucosinolate  
639 metabolites required for an Arabidopsis innate immune response. *Science* (80- ).
- 640 **Dai, C. and Xue, H.W.** (2010). Rice early flowering1, a CKI, phosphorylates DELLA protein SLR1  
641 to negatively regulate gibberellin signalling. *EMBO J.*
- 642 **Donà, M. and Mittelsten Scheid, O.** (2015). DNA Damage Repair in the Context of Plant  
643 Chromatin. *Plant Physiol.*
- 644 **Ensminger, M., Iloff, L., Ebel, C., Nikolova, T., Kaina, B., and Löbrich, M.** (2014). DNA  
645 breaks and chromosomal aberrations arise when replication meets base excision repair. *J.*  
646 *Cell Biol.*
- 647 **Farinas, B. and Mas, P.** (2011). Functional implication of the MYB transcription factor  
648 RVE8/LCL5 in the circadian control of histone acetylation. *Plant J.*
- 649 **Gangappa, S.N. and Botto, J.F.** (2016). The Multifaceted Roles of HY5 in Plant Growth and  
650 Development. *Mol. Plant.*
- 651 **Goodspeed, D., Chehab, E.W., Min-Venditti, A., Braam, J., and Covington, M.F.** (2012).  
652 Cozzarelli Prize Winner: Arabidopsis synchronizes jasmonate-mediated defense with  
653 insect circadian behavior. *Proc. Natl. Acad. Sci.*
- 654 **Hajdu, A., Ádám, É., Sheerin, D.J., Dobos, O., Bernula, P., Hiltbrunner, A., Kozma-Bognár,  
655 L., and Nagy, F.** (2015). High-level expression and phosphorylation of phytochrome B  
656 modulates flowering time in Arabidopsis. *Plant J.*
- 657 **Hardtke, C.S.** (2000). HY5 stability and activity in Arabidopsis is regulated by phosphorylation in  
658 its COP1 binding domain. *EMBO J.*

- 659 **Hawley, B.R., Lu, W.-T., Wilczynska, A., and Bushell, M.** (2017). The emerging role of RNAs  
660 in DNA damage repair. *Cell Death Differ.*
- 661 **Higdon, J. V., Delage, B., Williams, D.E., and Dashwood, R.H.** (2007). Cruciferous  
662 vegetables and human cancer risk: epidemiologic evidence and mechanistic basis.  
663 *Pharmacol. Res.*
- 664 **Huang, H., Alvarez, S., Bindbeutel, R., Shen, Z., Naldrett, M.J., Evans, B.S., Briggs, S.P.,  
665 Hicks, L.M., Kay, S.A., and Nusinow, D.A.** (2016). Identification of evening complex  
666 associated proteins in arabidopsis by affinity purification and mass spectrometry. *Mol. Cell.*  
667 *Proteomics.*
- 668 **Huseby, S., Koprivova, A., Lee, B.R., Saha, S., Mithen, R., Wold, A.B., Bengtsson, G.B.,  
669 and Kopriva, S.** (2013). Diurnal and light regulation of sulphur assimilation and  
670 glucosinolate biosynthesis in Arabidopsis. *J. Exp. Bot.*
- 671 **Jeong Br, B., Wu-Scharf, D., Zhang, C., and Cerutti, H.** (2002). Suppressors of transcriptional  
672 transgenic silencing in Chlamydomonas are sensitive to DNA-damaging agents and  
673 reactivate transposable elements. *Proc. Natl. Acad. Sci. U. S. A.*
- 674 **Kang, J., Cui, H., Jia, S., Liu, W., Yu, R., Wu, Z., and Wang, Z.** (2020). Arabidopsis thaliana  
675 MLK3, a plant-specific casein kinase 1, negatively regulates flowering and phosphorylates  
676 histone H3 in vitro. *Genes (Basel).*
- 677 **Kim, J.H., Lee, B.W., Schroeder, F.C., and Jander, G.** (2008). Identification of indole  
678 glucosinolate breakdown products with antifeedant effects on Myzus persicae (green  
679 peach aphid). *Plant J.*
- 680 **Kos, M., Houshyani, B., Achhmi, B.B., Wietsma, R., Gols, R., Weldegergis, B.T., Kabouw,  
681 P., Bouwmeester, H.J., Vet, L.E.M., Dicke, M., and van Loon, J.J.A.** (2012). Herbivore-

- 682 Mediated Effects of Glucosinolates on Different Natural Enemies of a Specialist Aphid. *J.*  
683 *Chem. Ecol.*
- 684 **Legris, M., Klose, C., Burgie, E.S., Rojas, C.C., Neme, M., Hiltbrunner, A., Wigge, P.A.,**  
685 **Schäfer, E., Vierstra, R.D., and Casal, J.J.** (2016). Phytochrome B integrates light and  
686 temperature signals in *Arabidopsis*. *Science* (80-. ).
- 687 **Liu, Q. et al.** (2017). Molecular basis for blue light-dependent phosphorylation of *Arabidopsis*  
688 cryptochrome 2. *Nat. Commun.*
- 689 **Maronedze, C., Groen, A.J., Thomas, L., Lilley, K.S., and Gehring, C.** (2016). A  
690 Quantitative Phosphoproteome Analysis of cGMP-Dependent Cellular Responses in  
691 *Arabidopsis thaliana*. *Mol. Plant.*
- 692 **Medzihradzky, M. et al.** (2013). Phosphorylation of Phytochrome B Inhibits Light-Induced  
693 Signaling via Accelerated Dark Reversion in *Arabidopsis*. *Plant Cell.*
- 694 **Mergner, J. et al.** (2020). Mass-spectrometry-based draft of the *Arabidopsis* proteome. *Nature.*
- 695 **Ni, W., Xu, S.-L., González-Grandío, E., Chalkley, R.J., Huhmer, A.F.R., Burlingame, A.L.,**  
696 **Wang, Z.-Y., and Quail, P.H.** (2017). PPKs mediate direct signal transfer from  
697 phytochrome photoreceptors to transcription factor PIF3. *Nat. Commun.*
- 698 **Nito, K., Wong, C.C.L., Yates, J.R., and Chory, J.** (2013). Tyrosine Phosphorylation  
699 Regulates the Activity of Phytochrome Photoreceptors. *Cell Rep.*
- 700 **Ohtsubo, T., Matsuda, O., Iba, K., Terashima, I., Sekiguchi, M., and Nakabeppu, Y.** (1998).  
701 Molecular cloning of AtMMH, an *Arabidopsis thaliana* ortholog of the *Escherichia coli* mutM  
702 gene, and analysis of functional domains of its product. *Mol. Gen. Genet.*
- 703 **Portolés, S. and Más, P.** (2010). The functional interplay between protein kinase CK2 and *cca1*  
704 transcriptional activity is essential for clock temperature compensation in *Arabidopsis*.

- 705 PLoS Genet.
- 706 **Probst, A. V. and Mittelsten Scheid, O.** (2015). Stress-induced structural changes in plant  
707 chromatin. *Curr. Opin. Plant Biol.*
- 708 **Rademacher, E.H. and Offringa, R.** (2012). Evolutionary Adaptations of Plant AGC Kinases:  
709 From Light Signaling to Cell Polarity Regulation. *Front. Plant Sci.*
- 710 **Reimand, J., Arak, T., Adler, P., Kolberg, L., Reisberg, S., Peterson, H., and Vilo, J.** (2016).  
711 g:Profiler—a web server for functional interpretation of gene lists (2016 update). *Nucleic  
712 Acids Res.*
- 713 **Rosa, S. and Shaw, P.** (2013). *Insights into Chromatin Structure and Dynamics in Plants.*  
714 *Biology (Basel).*
- 715 **Roy, S., Choudhury, S.R., Sengupta, D.N., and Das, K.P.** (2013). Involvement of AtPol in the  
716 Repair of High Salt- and DNA Cross-Linking Agent-Induced Double Strand Breaks in  
717 Arabidopsis. *PLANT Physiol.*
- 718 **Sakamoto, Y. and Takagi, S.** (2013). LITTLE NUCLEI 1 and 4 regulate nuclear morphology in  
719 arabidopsis thaliana. *Plant Cell Physiol.*
- 720 **Schwartz, D. and Gygi, S.P.** (2005). An iterative statistical approach to the identification of  
721 protein phosphorylation motifs from large-scale data sets. *Nat. Biotechnol.*
- 722 **Silva-Sanchez, C., Li, H., and Chen, S.** (2015). Recent advances and challenges in plant  
723 phosphoproteomics. *Proteomics.*
- 724 **Sønderby, I.E., Geu-Flores, F., and Halkier, B.A.** (2010). Biosynthesis of glucosinolates—gene  
725 discovery and beyond. *Trends Plant Sci.*
- 726 **Su, Y., Wang, S., Zhang, F., Zheng, H., Liu, Y., Huang, T., and Ding, Y.** (2017).

- 727 Phosphorylation of Histone H2A at Serine 95: A Plant-specific Mark Involved in Flowering  
728 Time Regulation and H2A.Z Deposition. *Plant Cell*.
- 729 **Sugiyama, N., Nakagami, H., Mochida, K., Daudi, A., Tomita, M., Shirasu, K., and**  
730 **Ishihama, Y.** (2008). Large-scale phosphorylation mapping reveals the extent of tyrosine  
731 phosphorylation in *Arabidopsis*. *Mol. Syst. Biol.*
- 732 **Sun, K., Xue, X., Liu, N., Zhu, Z., and Li, H.** (2020). A point-to-point protein–protein interaction  
733 assay reveals the signaling interplays among plant hormones and environmental cues.  
734 *Plant Direct*.
- 735 **Supek, F., Bošnjak, M., Škunca, N., and Šmuc, T.** (2011). Revigo summarizes and visualizes  
736 long lists of gene ontology terms. *PLoS One*.
- 737 **Suzuki, K., Sako, K., Akiyama, K., Isoda, M., Senoo, C., Nakajo, N., and Sagata, N.** (2015).  
738 Identification of non-Ser/Thr-Pro consensus motifs for Cdk1 and their roles in mitotic  
739 regulation of C2H2 zinc finger proteins and Ect2. *Sci. Rep.*
- 740 **Tessadori, F. et al.** (2009). PHYTOCHROME B and HISTONE DEACETYLASE 6 control light-  
741 induced chromatin compaction in *Arabidopsis thaliana*. *PLoS Genet.*
- 742 **Vergara, Z. and Gutierrez, C.** (2017). Emerging roles of chromatin in the maintenance of  
743 genome organization and function in plants. *Genome Biol.*
- 744 **Vlastaridis, P., Kyriakidou, P., Chaliotis, A., Van de Peer, Y., Oliver, S.G., and Amoutzias,**  
745 **G.D.** (2017). Estimating the total number of phosphoproteins and phosphorylation sites in  
746 eukaryotic proteomes. *Gigascience*.
- 747 **Wang, H., Dittmer, T.A., and Richards, E.J.** (2013). *Arabidopsis* CROWDED NUCLEI (CRWN)  
748 proteins are required for nuclear size control and heterochromatin organization. *BMC Plant*  
749 *Biol.*

- 750 **Wang, Y., Liu, Z., Cheng, H., Gao, T., Pan, Z., Yang, Q., Guo, A., and Xue, Y.** (2014). EKPD:  
751 A hierarchical database of eukaryotic protein kinases and protein phosphatases. *Nucleic*  
752 *Acids Res.*
- 753 **Wang, Z., Casas-Mollano, J.A., Xu, J., Riethoven, J.-J.M., Zhang, C., and Cerutti, H.**  
754 (2015a). Osmotic stress induces phosphorylation of histone H3 at threonine 3 in  
755 pericentromeric regions of *Arabidopsis thaliana*. *Proc. Natl. Acad. Sci. U. S. A.*
- 756 **Wang, Z., Yang, R., Guo, L., Fang, M., Zhou, Y., and Gu, Z.** (2015b). Effects of abscisic acid  
757 on glucosinolate content, isothiocyanate formation and myrosinase activity in cabbage  
758 sprouts. *Int. J. Food Sci. Technol.*
- 759 **West, C.E., Waterworth, W.M., Jiang, Q., and Bray, C.M.** (2000). *Arabidopsis* DNA ligase IV  
760 is induced by  $\gamma$ -irradiation and interacts with an *Arabidopsis* homologue of the double  
761 strand break repair protein XRCC4. *Plant J.*
- 762 **van Wijk, K.J., Friso, G., Walther, D., and Schulze, W.X.** (2014). Meta-Analysis of  
763 *Arabidopsis thaliana* Phospho-Proteomics Data Reveals Compartmentalization of  
764 Phosphorylation Motifs. *Plant Cell.*
- 765 **Yuan, D., Lai, J., Xu, P., Zhang, S., Zhang, J., Li, C., Wang, Y., Du, J., Liu, Y., and Yang, C.**  
766 (2014). AtMMS21 regulates DNA damage response and homologous recombination repair  
767 in *Arabidopsis*. *DNA Repair (Amst).*
- 768 **van Zanten, M., Tessadori, F., McLoughlin, F., Smith, R., Millenaar, F.F., van Driel, R.,**  
769 **Voeselek, L.A.C.J., Peeters, A.J.M., and Fransz, P.** (2010). Photoreceptors  
770 CRYPTOCHROME2 and Phytochrome B Control Chromatin Compaction in *Arabidopsis*.  
771 *PLANT Physiol.*
- 772 **Zheng, H., Zhang, F., Wang, S., Su, Y., Jiang, P., Cheng, R., Ji, X., Hou, S., and Ding, Y.**



773 (2017). MLK1 and MLK2 coordinate RGA and CCA1 activity to regulate hypocotyl  
774 elongation in *Arabidopsis thaliana*. *Plant Cell*.

775 **Zhu, M. and Assmann, S.M.** (2017). Metabolic Signatures in Response to Abscisic Acid (ABA)  
776 Treatment in *Brassica napus* Guard Cells Revealed by Metabolomics. *Sci. Rep*.

777

778

779

780

781

782

783

784

785

786

787

788

789

790

791

792

## 793 **Figure Legends**

### 794 **Figure 1. Schematic Representation of the Quantitative Proteomics Workflow**

795 Tissue samples were collected at ZT12 and ZT14 from wild-type and mutant seedlings entrained  
796 with a 12L:12D light/dark cycle (1). Total protein was extracted and digested (2). Following  
797 TMT10plex isobaric labeling (3), samples were subjected to high pH reversed phase  
798 prefractionation (5). Phosphopeptides were enriched using a TiO<sub>2</sub>-based method (4). Both  
799 phosphopeptide-enriched and global samples were analyzed by LC-MS/MS (6).

### 800 **Figure 2. Global Proteomic Analysis of *mlk* Mutant Seedlings**

801 Volcano plots of peptides identified in mutant and wild-type seedlings at ZT12 and ZT14. The  
802 x-axis specifies the log<sub>2</sub> fold-change (FC) of mutant/wild type and the y-axis specifies the  
803 negative logarithm to the base 10 of the t-test p-values. Open circles represent individual  
804 peptides, with blue circles specifying those considered statistically significant. Black vertical  
805 and horizontal lines reflect the filtering criteria (log<sub>2</sub> FC = ±1 and p-value = 0.05) for  
806 significance.

### 807 **Figure 3. Gene Ontology (GO) Enrichment Analysis**

808 GO enrichment analysis of proteins identified as having increased (A) or decreased (B)  
809 abundance in *mlk* mutant seedlings at indicated ZTs when compared to wild type. Cluster  
810 representative GO terms identified with REVIGO (semantic similarity threshold < 0.7) in the  
811 category of Biological Process are shown.

### 812 **Figure 4. *mlk* Mutant Seedlings Contain Elevated Levels of MET Derived Glucosinolates**

813 Glucosinolate (GLS) content of ten day old mutant and wild-type seedlings at ZT12 was  
814 quantified using HPLC. GLS identity determined using UV spectra and confirmed by LC-

815 MS/MS. The average of four biological replicates is presented. Error bars indicate standard  
816 deviation. \* $P < 0.01$ , compared with wild type seedlings (Student's  $t$ -test).

### 817 **Figure 5. Analysis of Quantitative Phosphoproteomics of *mlk* Mutant Seedlings**

818 (A) The distribution of threonine (T), serine (S), and tyrosine (Y) phosphorylation sites identified  
819 at ZT12 and ZT14. (B) Volcano plot of phosphopeptides identified in mutant and wild-type  
820 seedlings at ZT12 and ZT14. The x-axis specifies the  $\log_2$  fold-change (FC) of mutant/wild-  
821 type and the y-axis specifies the negative logarithm to the base 10 of the  $t$ -test  $p$ -values. Open  
822 circles represent individual peptides, with blue circles specifying those considered statistically  
823 significant. Black vertical and horizontal lines reflect the filtering criteria ( $\log_2$  FC =  $\pm 0.585$  and  
824  $p$ -value = 0.05) for significance. (C and D) Size-proportional Venn diagrams of differentially  
825 regulated phosphoproteins in *mlk1/2/3* and *mlk1/3/4* mutants at ZT12 (C) and ZT14 (D).  
826 Numbers indicate unique phosphoproteins.

### 827 **Figure 6. Motif Analysis of Differentially Phosphorylated Peptides**

828 Phosphopeptides with altered abundance in *mlk1/3/4* mutants at ZT12 (A) and ZT14 (B) where  
829 extended (<http://schwartzlab.uconn.edu/pepextend>) and centered. Motif-X analysis was then  
830 performed with the probability threshold was set to  $p$ -value  $\leq 10^{-6}$ , the occurrence threshold  
831 was set to 20, and the default IPI Arabidopsis Proteome data set was used as the background  
832 data set.

### 833 **Figure 7. Gene Ontology Enrichment Analysis of Differentially Phosphorylated Proteins**

834 (A) Heat map showing the  $p$ -value significance of enriched cellular component GO categories  
835 of proteins with altered abundance in *mlk* mutant seedlings at ZT12 and ZT14. (B and C)  
836 Treemap representation of Biological Process GO categories enriched in *mlk1/3/4* mutant  
837 seedlings at ZT12 (B) and ZT14 (C). The box size correlates to the  $-\log_{10}$   $P$ -value of the GO-  
838 term enrichment. Boxes with the same color indicate related GO-terms and correspond to the

839 representative GO-term which is found in the upper-left of each box. REVIGO was used to  
840 eliminate redundant GO-terms with a dispensability value  $\geq 0.7$  (A) or  $\geq 0.5$  (B and C).

#### 841 **Figure 8. Analysis of Differentially Phosphorylated Peptides in *mlk1/3/4* Mutants at ZT12**

842 (A) Size-proportional Venn diagram of proteins which show increased, decreased, or both  
843 increased and decreased abundance of identified phosphosites in *mlk1/3/4* mutant seedlings  
844 at ZT12. Numbers indicate unique phosphoproteins. Analysis of phosphoproteins that show  
845 increased (B) or decreased (C) in abundance in the *mlk1/3/4* mutant seedlings background at  
846 ZT12. Treemap representations of Biological Process GO category enrichment are shown. The  
847 box size correlates to the  $-\log_{10}$  *P*-value of the GO-term enrichment. Boxes with the same color  
848 indicate related GO-terms and correspond to the representative GO-term which is found in the  
849 upper-left of each box. REVIGO was used to eliminate redundant GO-terms with a dispensability  
850 value  $\geq 0.5$ .

#### 851 **Figure 9. *mlk1/3/4* Mutants Have Increased Sensitivity to MMS Treatment**

852 (A) Representative images of mutant and wild-type seedlings 15 days after transfer to solid  
853 media containing the indicated concentration of MMS. Chlorotic tissue is denoted with a blue  
854 arrowhead. Scale bar = 5 mm. (B) Fresh weight of 21-day old wild type and mutant seedlings  
855 grown in the presence of MMS relative to mock treated samples. The average of 3 biological  
856 replicates of  $\geq 10$  seedlings each is presented. (C) Percent of seedlings exhibiting post-  
857 germination developmental arrest after 12 days of growth in the presence of 150 PMM MMS.  
858 The average of 3 biological replicates of  $\geq 30$  seedlings is presented. (B and C) Error bars  
859 indicate standard deviation. \* $P < 0.05$ , \*\* $P < 0.01$  compared with wild-type seedlings (Student's *t*-  
860 test). (D) Representative images of mutant and wild type seedlings germinated in the presence  
861 of 150 PPM MMS. (E) Representative images of mutant and wild-type seedlings irradiated with  
862 indicated levels of UV-C. Scale bar = 2 mm.

Table 1. Protoporphyrins Identified in Circadian-Associated Proteins. bioRxiv preprint doi: <https://doi.org/10.1101/2020.02.14.950030>; this version posted July 25, 2020. The copyright holder for this preprint (which was not certified by peer review) is the author/funder, who has granted bioRxiv a license to display the preprint in perpetuity. It is made available under aCC-BY-NC-ND 4.0 International license.

| Protein Group Accession | Protein Names | Protein Description                                                                        | Peptide Sequence                                                            | Log2 FC | P-Value  |
|-------------------------|---------------|--------------------------------------------------------------------------------------------|-----------------------------------------------------------------------------|---------|----------|
| AT2G18790               | PHYB          | phytochrome B                                                                              | GGEQAQSSG <b>T</b> <sup>42K</sup>                                           | -1.36   | 5.95E-06 |
| AT4G30200               | VEL1          | vernalization5/VIN3-like protein                                                           | KP <b>S</b> <sup>506</sup> SKNEDNNSPSVDESAAK                                | -0.89   | 3.00E-02 |
| AT5G11260               | HY5           | Basic-leucine zipper (bZIP) transcription factor family protein                            | ESGSAT <sup>64</sup> GQER                                                   | -0.81   | 1.46E-02 |
| AT3G22380               | TIC           | time for coffee                                                                            | MP <b>S</b> <sup>324</sup> TSKQEAAGNDLTEAAK                                 | -0.79   | 1.98E-04 |
| AT5G02810               | PRR7          | pseudo-response regulator 7                                                                | QD <b>N</b> S <sup>355</sup> FEK                                            | -0.74   | 1.04E-05 |
| AT2G17840               | ERD7          | Senescence/dehydration-associated protein-like protein                                     | SA <b>A</b> S <sup>488</sup> QKK                                            | -0.69   | 3.95E-02 |
| AT5G02810               | PRR7          | pseudo-response regulator 7                                                                | AV <b>S</b> <sup>275</sup> LWDR                                             | -0.62   | 1.93E-03 |
| AT4G30200               | VEL1          | vernalization5/VIN3-like protein                                                           | LCSSALESLETI <b>A</b> T <sup>330</sup> TPPDVAALP <b>S</b> <sup>340</sup> PR | 0.61    | 1.53E-02 |
| AT4G30200               | VEL1          | vernalization5/VIN3-like protein                                                           | NEDNN <b>S</b> P <b>S</b> <sup>516</sup> VDESAAK                            | 0.63    | 1.01E-04 |
| AT5G52310               | LT178         | low-temperature-responsive protein 78 (LT178) / desiccation-responsive protein 29A (RD29A) | NEYSPE <b>S</b> <sup>387</sup> DGGLGAPLGGNFPVR                              | 0.64    | 6.53E-03 |
| AT3G09600               | RVE8          | Homeodomain-like superfamily protein                                                       | GLLN <b>V</b> SSP <b>S</b> TSGMG <b>S</b> SSSR                              | 0.83    | 1.72E-03 |
| AT3G46780               | PTAC16        | plastid transcriptionally active 16                                                        | ADAVGV <b>T</b> <sup>410</sup> VDGLFNK                                      | 0.95    | 9.29E-03 |

## ZT12 & ZT14

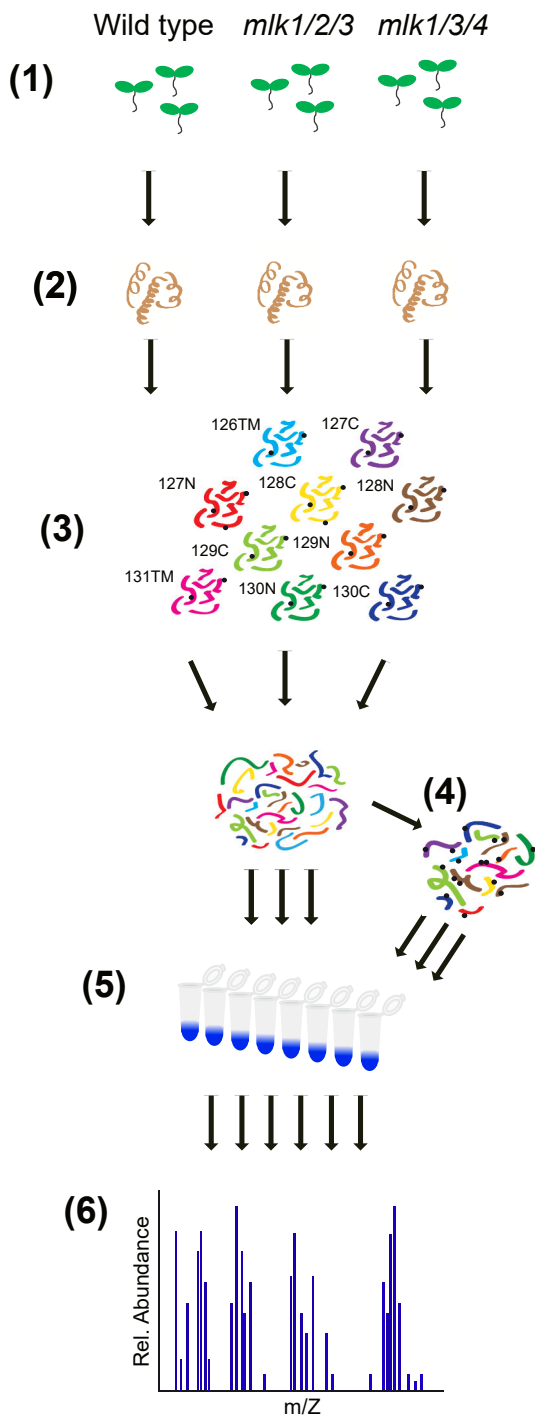

**Figure 1. Schematic Representation of the Quantitative Proteomics Workflow**

Tissue samples were collected at ZT12 and ZT14 from wild type and mutant seedlings entrained with at 12L:12D light cycle (1). Total protein was extracted and digested (2). Following TMT10plex isobaric labeling (3), samples were subjected to high pH reversed phase pre-fractionation (5). Phosphopeptides were enriched using a TiO<sub>2</sub>-based method (4). Both phosphopeptide-enriched and global samples were analyzed by LC-MS/MS (6).

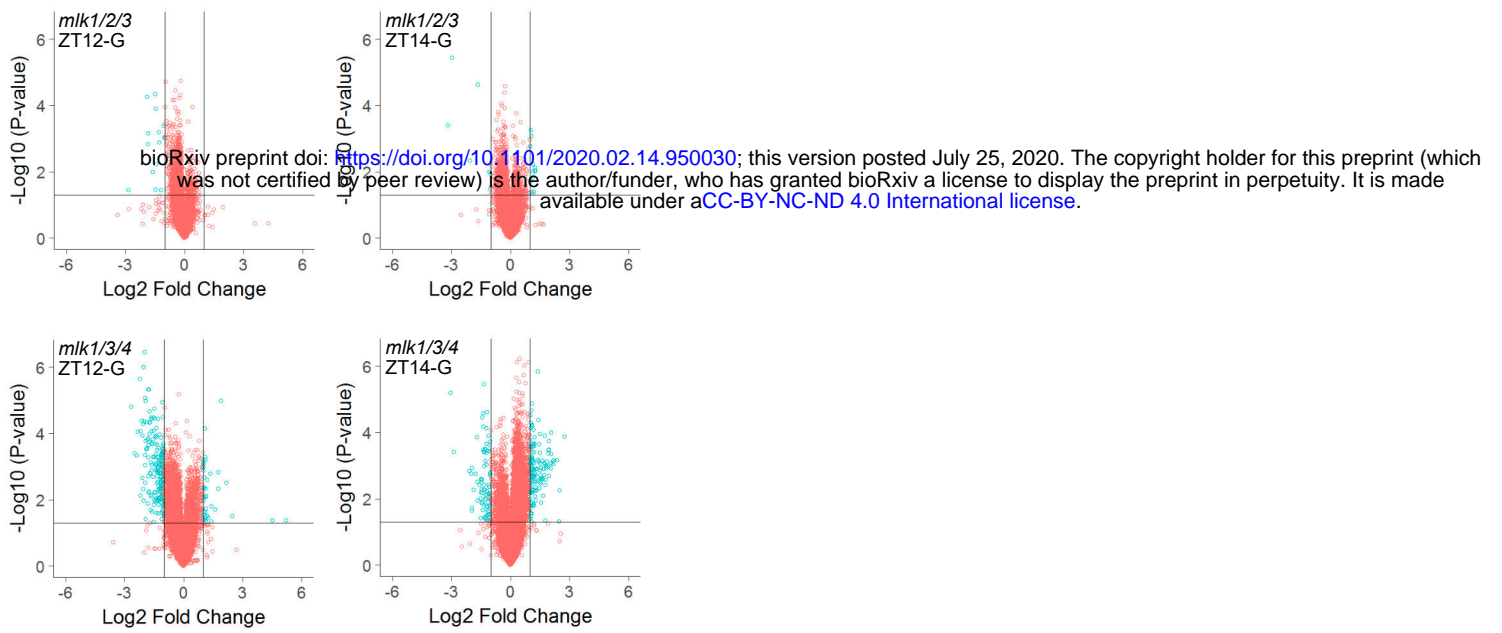

**Figure 2. Global Proteomic Analysis of *mlk* Mutant Seedlings**

Volcano plots of peptides identified in mutant and wild-type seedlings at ZT12 and ZT14. The x-axis specifies the  $\log_2$  fold-change (FC) of mutant/wild-type and the y-axis specifies the negative logarithm to the base 10 of the t-test p-values. Open circles represent individual peptides, with blue circles specifying those considered statistically significant. Black vertical and horizontal lines reflect the filtering criteria ( $\log_2 \text{FC} = \pm 1$  and  $\text{p-value} = 0.05$ ) for significance.

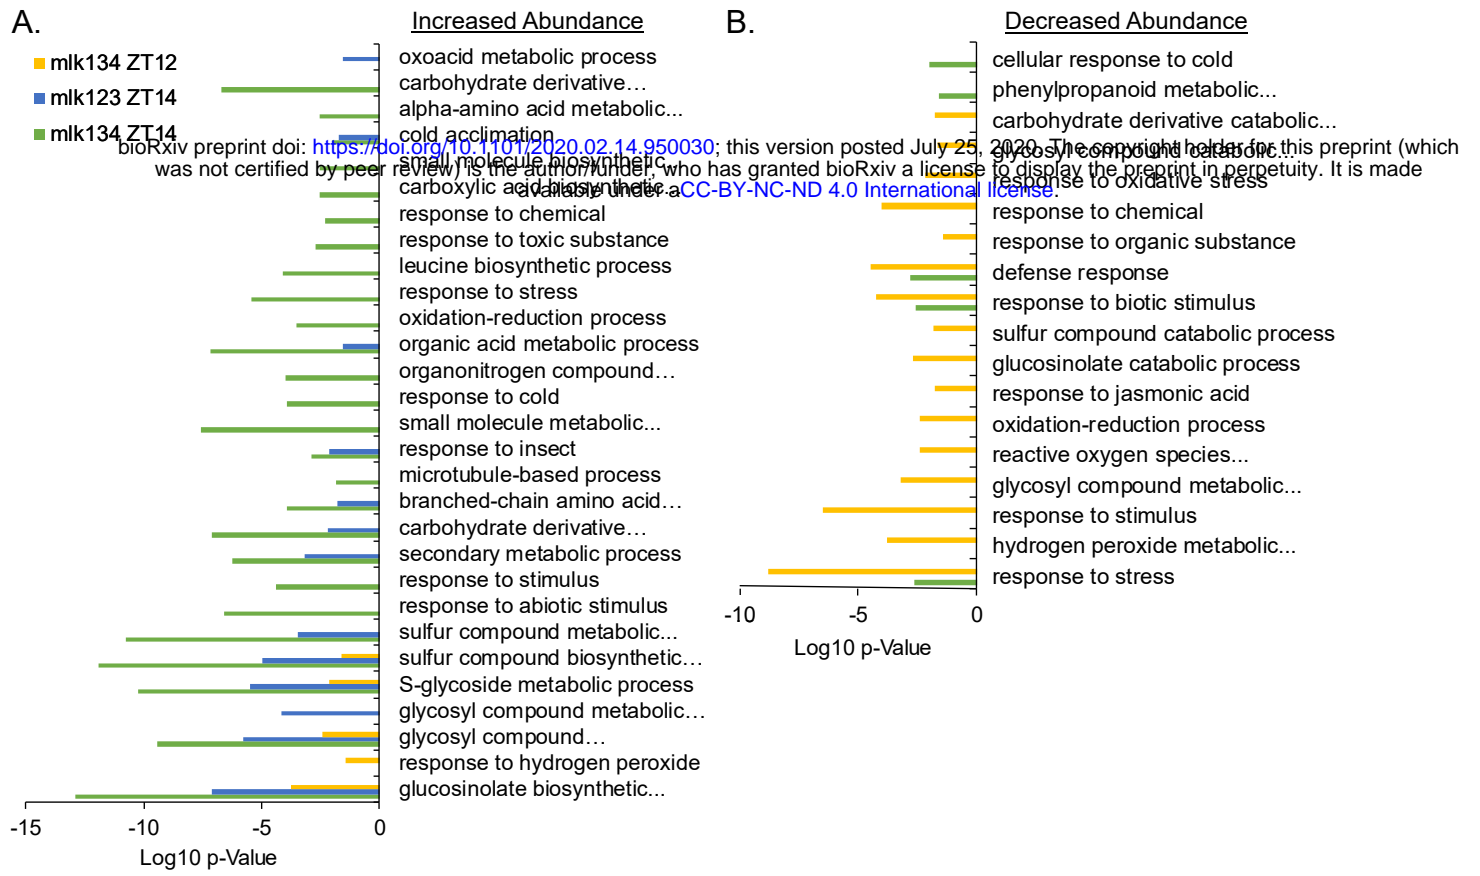

**Figure 3. Gene Ontology (GO) Enrichment Analysis**

GO enrichment analysis of proteins identified as having increased (A) or decreased (B) abundance in *mlk* mutant seedlings at indicated ZTs when compared to wild-type. Cluster representative GO terms identified with REVIGO (semantic similarity threshold < 0.7) in the category of Biological Process are shown.



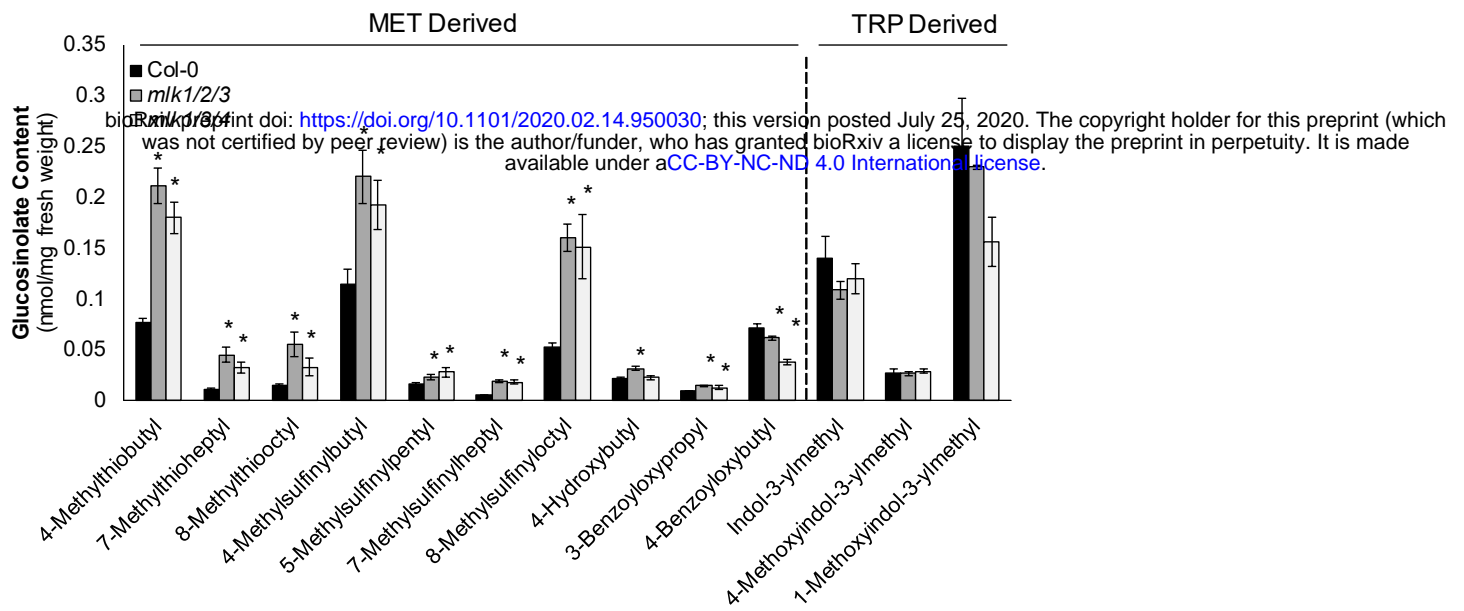

**Figure 4. *mlk* Mutant Seedlings Contain Elevated Levels of MET Derived Glucosinolates**

Glucosinolate (GLS) content of 10 day old mutant and wild type seedlings at ZT12 was quantified using HPLC. GLS identity determined using UV spectra and confirmed by LC-MS/MS. The average of 4 biological replicates is presented. Error bars indicate standard deviation. \* $P < 0.01$ , compared with wild-type seedlings (Student's *t*-test).

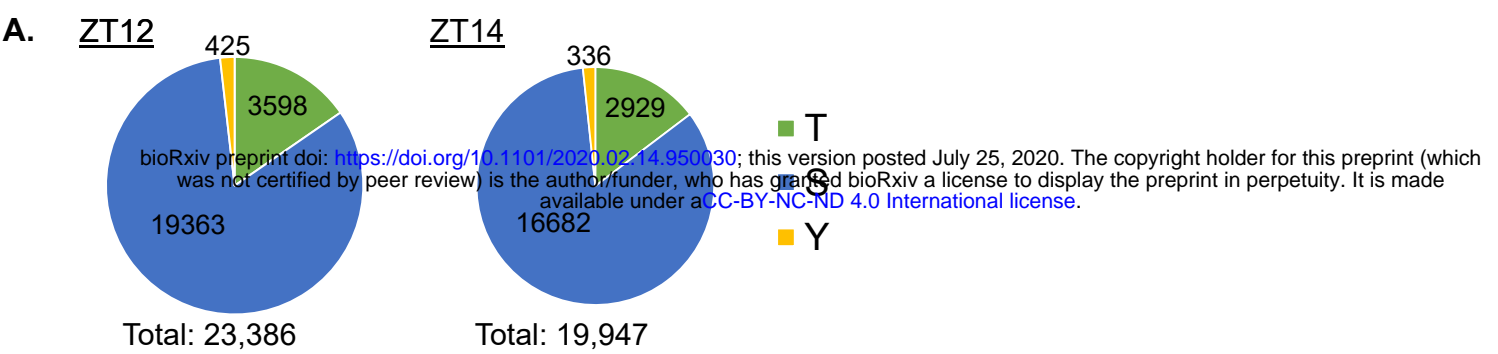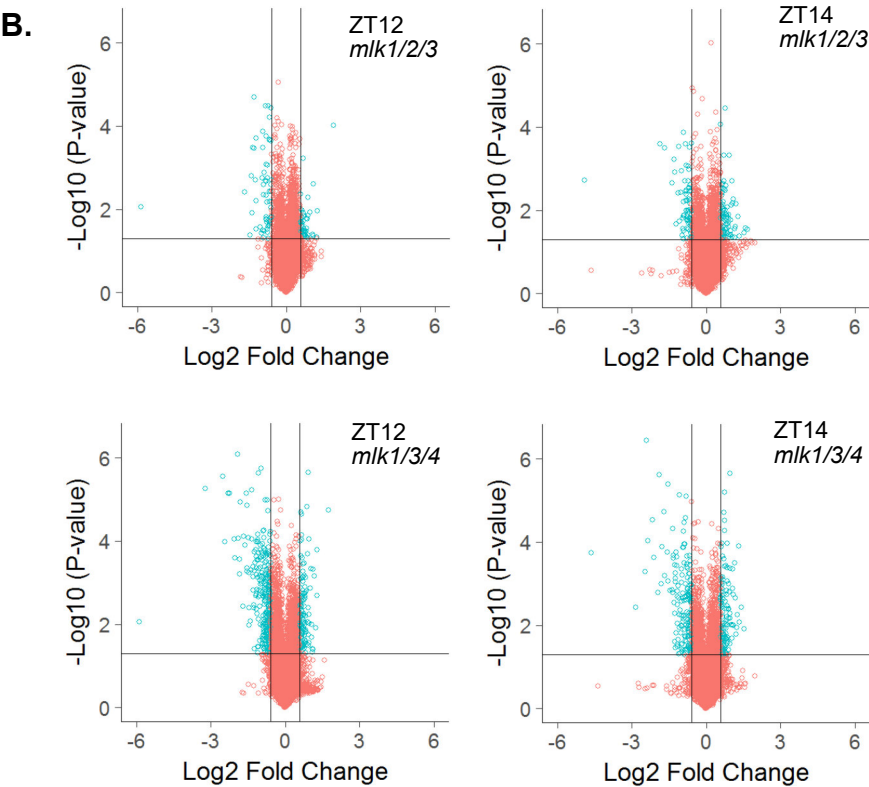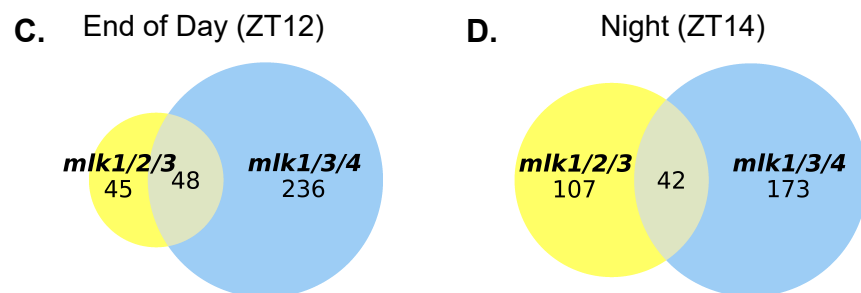

**Figure 5. Analysis of Quantitative Phosphoproteomics of *mlk* Mutant Seedlings**

(A) The distribution of threonine (T), serine (S), and tyrosine (Y) phosphorylation sites identified at ZT12 and ZT14. (B) Volcano plot of phosphopeptides identified in mutant and wild-type seedlings at ZT12 and ZT14. The x-axis specifies the log<sub>2</sub> fold-change (FC) of mutant/wild-type and the y-axis specifies the negative logarithm to the base 10 of the t-test p-values. Open circles represent individual peptides, with blue circles specifying those considered statistically significant. Black vertical and horizontal lines reflect the filtering criteria (log<sub>2</sub> FC = ±0.585 and p-value = 0.05) for significance. (C and D) Size-proportional Venn diagrams of differentially regulated phosphoproteins in *mlk1/2/3* and *mlk1/3/4* mutants at ZT12 (C) and ZT14 (D). Numbers indicate unique phosphoproteins.

A.

|           | # | Motif         | Motif Score | Foreground Matches | Foreground Size | Background Matches | Background Size | Fold Increase |
|-----------|---|---------------|-------------|--------------------|-----------------|--------------------|-----------------|---------------|
| Decreased | 1 | ...S...K..... | 10.36       | 28                 | 188             | 69899              | 1013104         | 2.36          |
|           | 2 | ...R...S..... | 5.02        | 22                 | 127             | 55173              | 899957          | 2.83          |
|           | 3 | ...K..S.....  | 5.02        | 22                 | 127             | 55173              | 899957          | 2.83          |
| Increased | 1 | .....SP.....  | 10.53       | 42                 | 250             | 53111              | 1013104         | 3.2           |
|           | 2 | .....S.S..... | 6.52        | 51                 | 208             | 113600             | 959993          | 2.07          |

Decreased

Increased

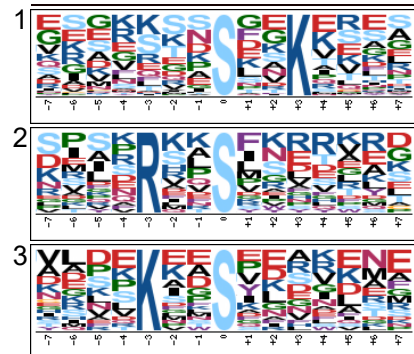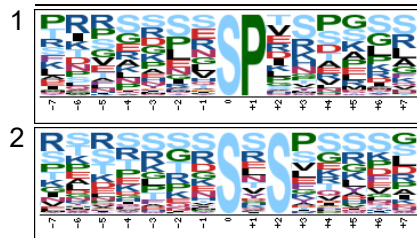

B.

|           | # | Motif        | Motif Score | Foreground Matches | Foreground Size | Background Matches | Background Size | Fold Increase |
|-----------|---|--------------|-------------|--------------------|-----------------|--------------------|-----------------|---------------|
| Decreased | 1 | .....S.....E | 6.15        | 27                 | 149             | 63949              | 1013104         | 2.87          |
|           | 2 | ...K..S..... | 5.12        | 21                 | 122             | 55198              | 949155          | 2.96          |
| Increased | 1 | .....SP..... | 11.64       | 25                 | 88              | 53111              | 1013104         | 5.42          |

Decreased

Increased

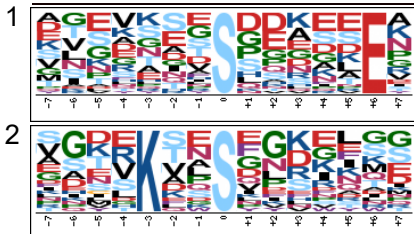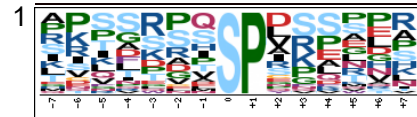

**Figure 6. Motif Analysis of Differentially Phosphorylated Peptides**

Phosphopeptides with altered abundance in *mlk1/3/4* mutants at ZT12 (A) and ZT14 (B) where extended (<http://schwartzlab.uconn.edu/pepextend>) and centered. Motif-X analysis was then performed with the probability threshold was set to  $p\text{-value} \leq 10^{-6}$ , the occurrence threshold was set to 20, and the default IPI Arabidopsis Proteome data set was used as the background data set.

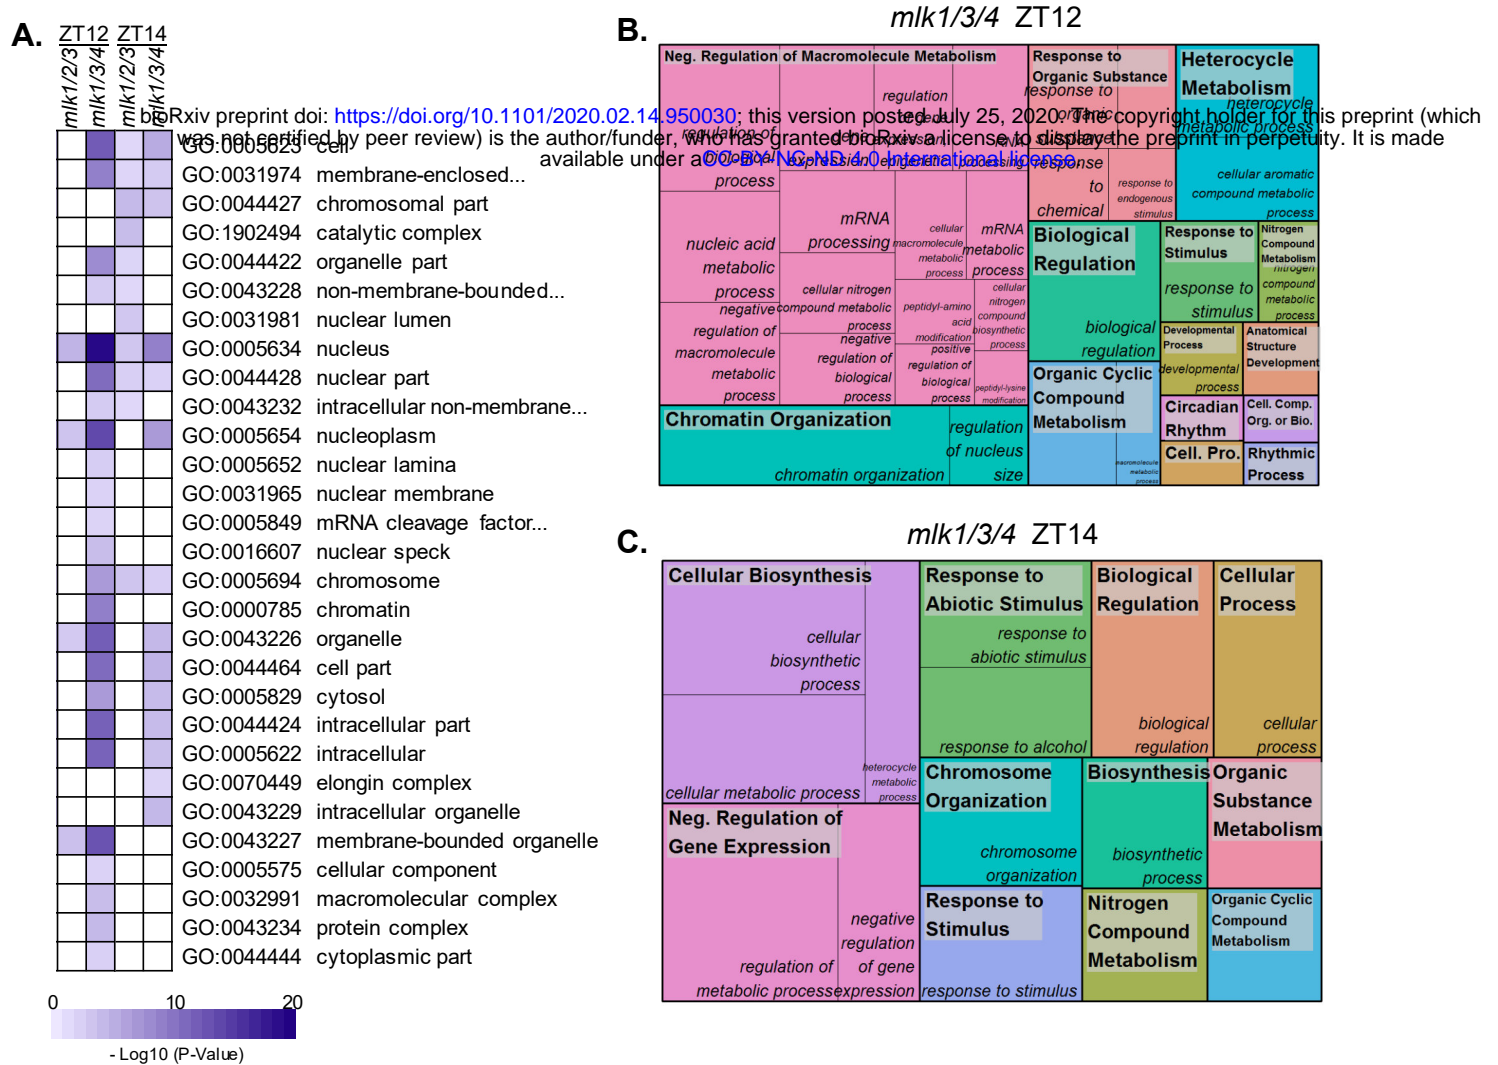

**Figure 7. Gene Ontology Enrichment Analysis of Differentially Phosphorylated Proteins**

(A) Heat map showing the p-value significance of enriched cellular component GO categories of proteins with altered abundance in *mlk* mutant seedlings at ZT12 and ZT14. (B and C) Treemap representation of Biological Process GO categories enriched in *mlk1/3/4* mutant seedlings at ZT12 (B) and ZT14 (C). The box size correlates to the  $-\log_{10}$  *P*-value of the GO-term enrichment. Boxes with the same color indicate related GO-terms and correspond to the representative GO-term which is found in the upper-left of each box. REVIGO was used to eliminate redundant GO-terms with a dispensability value  $\geq 0.7$  (A) or  $\geq 0.5$  (B and C).

A.

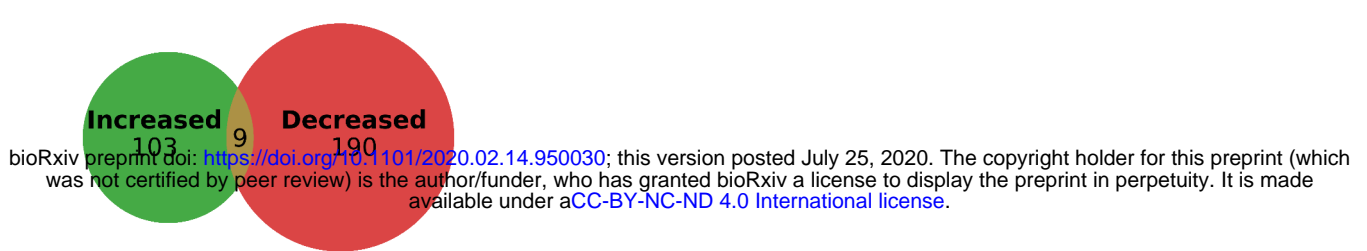

B.

Increased  
↑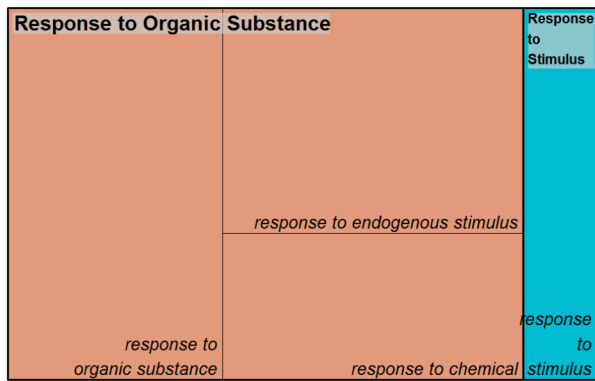

C.

Decreased  
↓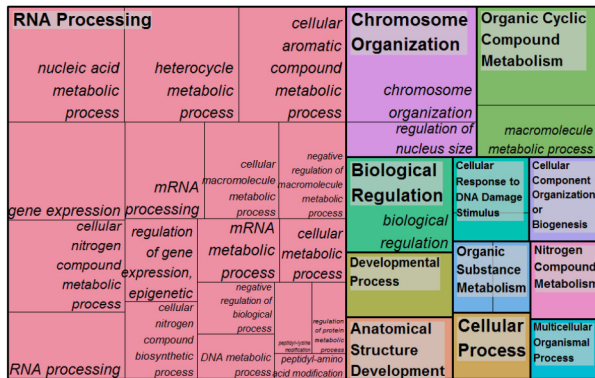

**Figure 8. Analysis of Differentially Phosphorylated Peptides in *mlk1/3/4* Mutants at ZT12**

(A) Size-proportional Venn diagram of proteins which show increased, decreased, or both increased and decreased abundance of identified phosphosites in *mlk1/3/4* mutant seedlings at ZT12. Numbers indicate unique phosphoproteins. Analysis of phosphoproteins that show increased (B) or decreased (C) in abundance in the *mlk1/3/4* mutant seedlings background at ZT12. Treemap representations of Biological Process GO category enrichment are shown. The box size correlates to the  $-\log_{10} P$ -value of the GO-term enrichment. Boxes with the same color indicate related GO-terms and correspond to the representative GO-term which is found in the upper-left of each box. REVIGO was used to eliminate redundant GO-terms with a dispensability value  $\geq 0.5$ .

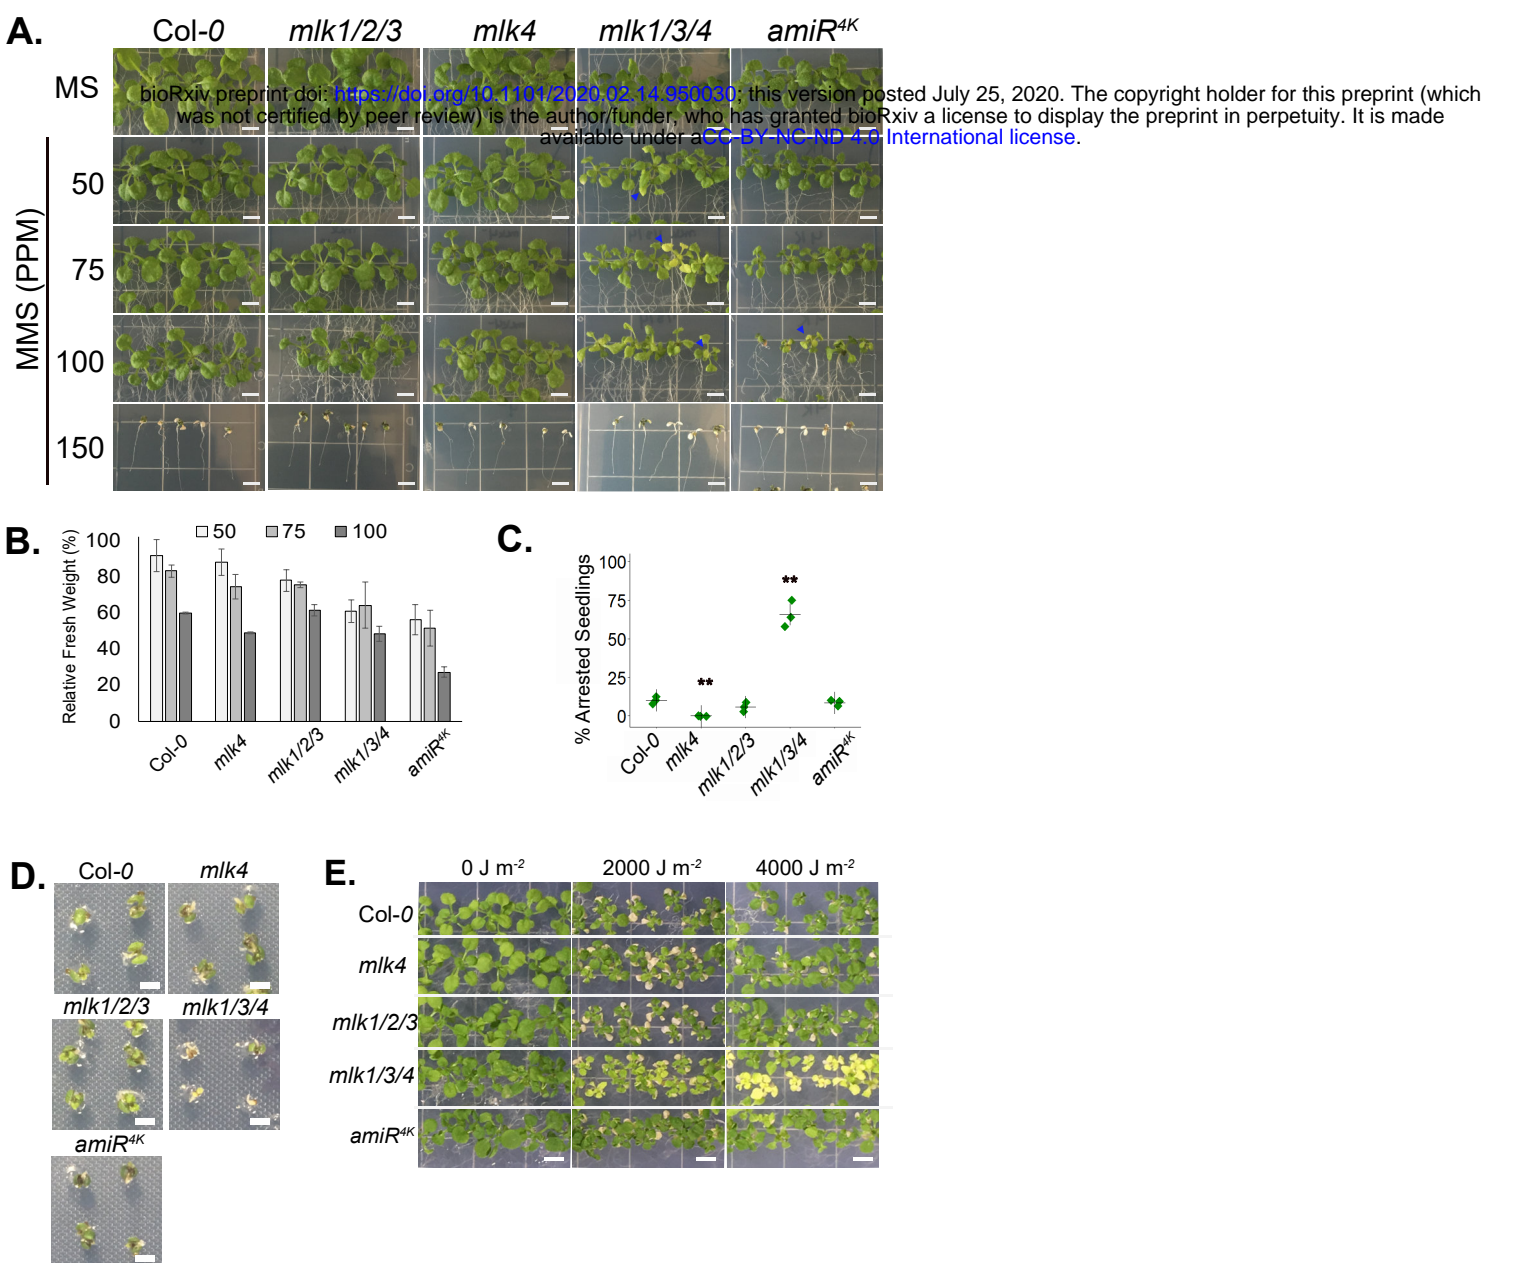

**Figure 9. *mlk1/3/4* Mutants Have Increased Sensitivity to MMS Treatment**

(A) Representative images of mutant and wild-type seedlings 15 days after transfer to solid media containing the indicated concentration of MMS. Chlorotic tissue is indicated with a blue arrowhead. Scale bar = 5 mm. (B) Fresh weight of 21-day old wild type and mutant seedlings grown in the presence of MMS relative to mock treated samples. The average of 3 biological replicates of  $\geq 10$  seedlings each is presented. (C) Percent of seedlings exhibiting post-germination developmental arrest after 12 days of growth in the presence of 150 PPM MMS. The average of 3 biological replicates of  $\geq 30$  seedlings is presented. (B and C) Error bars indicate standard deviation. \* $P < 0.05$ , \*\* $P < 0.01$  compared with wild-type seedlings (Student's *t*-test). (D) Representative images of mutant and wild-type seedlings germinated in the presence of 150 PPM MMS. (E) Representative images of mutant and wild-type seedlings irradiated with indicated levels of UV-C. Scale bar = 2 mm.
